# Supplementary material
Source: ML conference proceedings conference paper supplement (https://openreview.net/forum?id=D5v491uCzm)
Supplement: supplementary_material [file attachment]

OpenLLM Leaderboard v1

|                                      |      |     |           |            |            |       |         |
|--------------------------------------|------|-----|-----------|------------|------------|-------|---------|
| FLOPs                                | 9.2  | 7.9 | 5.5       | 5.0        | 8.8        | 20.0  | 9.4     |
| Size and Tokens                      | 7.5  | 3.1 | 3.4       | 1.9        | 5.6        | 7.9   | 4.9     |
| PCA + FLOPs (d=1)                    | 10.8 | 9.0 | 13.1      | 7.2        | 5.5        | 13.8  | 9.9     |
| PCA + FLOPs (d=2)                    | 10.8 | 8.3 | 12.2      | 6.0        | 5.2        | 12.8  | 9.2     |
| PCA + FLOPs (d=3)                    | 11.7 | 8.4 | 11.6      | 6.0        | 5.0        | 12.2  | 9.2     |
| PCA + FLOPs (d=4)                    | 12.7 | 8.3 | 11.3      | 5.8        | 8.1        | 12.1  | 9.7     |
| Sloth basic (d=1) (shared intercept) | 8.4  | 6.0 | 7.2       | 5.5        | 6.6        | 9.7   | 7.2     |
| Sloth basic (d=2) (shared intercept) | 7.6  | 6.1 | 6.5       | 4.7        | 4.8        | 8.8   | 6.4     |
| Sloth basic (d=3) (shared intercept) | 7.7  | 6.2 | 6.5       | 4.9        | 6.4        | 7.5   | 6.5     |
| Sloth basic (d=4) (shared intercept) | 7.6  | 6.2 | 6.6       | 4.9        | 6.3        | 7.3   | 6.5     |
| Sloth (d=1) (shared intercept)       | 8.9  | 5.2 | 6.9       | 5.5        | 7.7        | 13.1  | 7.9     |
| Sloth (d=2) (shared intercept)       | 8.0  | 5.2 | 5.9       | 4.9        | 6.3        | 10.9  | 6.9     |
| Sloth (d=3) (shared intercept)       | 7.7  | 5.6 | 5.8       | 4.9        | 5.8        | 10.8  | 6.8     |
| Sloth (d=4) (shared intercept)       | 8.0  | 5.1 | 5.7       | 4.6        | 5.8        | 11.5  | 6.8     |
| Sloth basic (d=1)                    | 11.9 | 6.4 | 7.9       | 4.8        | 5.3        | 19.1  | 9.2     |
| Sloth basic (d=2)                    | 5.3  | 4.9 | 6.9       | 3.3        | 4.1        | 10.2  | 5.8     |
| Sloth basic (d=3)                    | 4.9  | 4.8 | 6.0       | 3.1        | 5.6        | 8.6   | 5.5     |
| Sloth basic (d=4)                    | 4.5  | 5.1 | 5.9       | 3.1        | 5.0        | 7.4   | 5.2     |
| Sloth (d=1)                          | 8.5  | 4.2 | 5.5       | 4.0        | 5.3        | 14.8  | 7.0     |
| Sloth (d=2)                          | 4.0  | 2.8 | 3.6       | 2.2        | 5.1        | 6.9   | 4.1     |
| Sloth (d=3)                          | 4.7  | 3.2 | 3.5       | 1.9        | 4.3        | 7.5   | 4.2     |
| Sloth (d=4)                          | 5.0  | 3.0 | 3.3       | 2.0        | 4.9        | 8.0   | 4.3     |
|                                      | MMLU | ARC | HellaSwag | Winogrande | TruthfulQA | GSM8K | Average |
