# Supplementary material
Source: ML conference proceedings conference paper supplement (https://openreview.net/forum?id=D5v491uCzm)
Supplement: supplementary_material [file attachment]

OpenLLM Leaderboard v1

|                                      |      |     |           |            |            |       |         |
|--------------------------------------|------|-----|-----------|------------|------------|-------|---------|
| FLOPs (shared intercept)             | 9.4  | 6.2 | 7.1       | 5.2        | 6.4        | 12.4  | 7.8     |
| FLOPs                                | 6.5  | 3.0 | 3.0       | 2.2        | 9.0        | 5.7   | 4.9     |
| Size and Tokens                      | 7.1  | 3.2 | 3.8       | 2.6        | 4.5        | 5.2   | 4.4     |
| PCA + FLOPs (d=1)                    | 8.7  | 5.6 | 7.5       | 4.7        | 4.5        | 13.1  | 7.3     |
| PCA + FLOPs (d=2)                    | 8.7  | 3.1 | 4.2       | 2.1        | 4.3        | 13.8  | 6.0     |
| PCA + FLOPs (d=3)                    | 10.0 | 3.2 | 4.8       | 2.0        | 6.0        | 12.1  | 6.3     |
| PCA + FLOPs (d=4)                    | 9.7  | 3.2 | 4.9       | 2.0        | 6.2        | 12.2  | 6.4     |
| Sloth basic (d=1) (shared intercept) | 9.1  | 6.9 | 7.6       | 5.7        | 5.5        | 11.5  | 7.7     |
| Sloth basic (d=2) (shared intercept) | 9.5  | 6.4 | 6.9       | 5.0        | 4.6        | 10.4  | 7.1     |
| Sloth basic (d=3) (shared intercept) | 9.6  | 6.4 | 7.0       | 5.1        | 6.1        | 9.9   | 7.3     |
| Sloth basic (d=4) (shared intercept) | 9.6  | 6.4 | 7.0       | 5.1        | 6.2        | 9.8   | 7.3     |
| Sloth (d=1) (shared intercept)       | 8.9  | 6.3 | 8.2       | 5.7        | 5.5        | 11.7  | 7.7     |
| Sloth (d=2) (shared intercept)       | 8.0  | 5.7 | 6.6       | 5.4        | 5.3        | 11.0  | 7.0     |
| Sloth (d=3) (shared intercept)       | 8.0  | 5.9 | 6.6       | 5.6        | 4.9        | 11.3  | 7.1     |
| Sloth (d=4) (shared intercept)       | 8.4  | 5.6 | 6.7       | 5.5        | 4.7        | 11.4  | 7.0     |
| Sloth basic (d=1)                    | 8.3  | 6.8 | 9.8       | 5.3        | 6.5        | 13.5  | 8.4     |
| Sloth basic (d=2)                    | 7.4  | 4.1 | 6.8       | 3.5        | 4.2        | 9.1   | 5.8     |
| Sloth basic (d=3)                    | 5.8  | 3.9 | 6.1       | 3.4        | 5.4        | 7.4   | 5.3     |
| Sloth basic (d=4)                    | 5.7  | 4.6 | 6.3       | 3.2        | 5.0        | 5.9   | 5.1     |
| Sloth (d=1)                          | 8.2  | 3.1 | 4.4       | 2.5        | 4.4        | 11.0  | 5.6     |
| Sloth (d=2)                          | 4.4  | 2.7 | 4.2       | 2.9        | 3.8        | 7.7   | 4.3     |
| Sloth (d=3)                          | 4.8  | 2.8 | 4.0       | 2.8        | 4.9        | 6.3   | 4.2     |
| Sloth (d=4)                          | 5.3  | 2.7 | 3.6       | 2.6        | 4.2        | 5.9   | 4.1     |
|                                      | MMLU | ARC | HellaSwag | Winogrande | TruthfulQA | GSM8K | Average |
