# Supplementary material
Source: ML conference proceedings conference paper supplement (https://openreview.net/forum?id=D5v491uCzm)
Supplement: supplementary_material [file attachment]

Open LLM Leaderboard v2 (Average error across benchmarks)

|                          |       |        |        |         |                |              |      |      |       |            |        |        |
|--------------------------|-------|--------|--------|---------|----------------|--------------|------|------|-------|------------|--------|--------|
| FLOPs (shared intercept) | 2.4   | 1.4    | 4.0    | 7.1     | 1.4            | 14.6         | 4.2  | 2.4  | 6.2   | 4.8        | 1.4    | 8.3    |
| FLOPs                    | 2.3   | 4.0    | 3.9    | 3.5     | 1.3            | 4.3          | 2.5  | 5.3  | 9.0   | 1.5        | 3.3    | 4.5    |
| Size and Tokens          | 2.9   | 4.1    | 4.0    | 4.3     | 0.8            | 4.1          | 3.0  | 4.5  | 7.6   | 3.3        | 6.3    | 3.9    |
| PCA + FLOPs (d=1)        | 4.1   | 8.0    | 1.9    | 8.2     | 2.9            | 8.1          | 5.0  | 10.2 | 9.6   | 2.2        | 6.7    | 5.3    |
| PCA + FLOPs (d=2)        | 5.2   | 8.2    | 1.9    | 6.0     | 2.3            | 4.8          | 5.0  | 10.1 | 8.5   | 2.1        | 6.9    | 3.9    |
| PCA + FLOPs (d=3)        | 5.2   | 8.3    | 2.3    | 5.6     | 2.4            | 4.8          | 5.1  | 10.3 | 8.3   | 2.3        | 7.1    | 4.0    |
| PCA + FLOPs (d=4)        | 5.5   | 8.8    | 2.5    | 5.4     | 2.5            | 5.3          | 5.6  | 9.9  | 8.6   | 2.2        | 7.4    | 4.2    |
| Sloth basic (d=1)        | 1.3   | 4.8    | 4.4    | 8.9     | 1.6            | 11.4         | 2.1  | 5.3  | 11.3  | 3.5        | 2.4    | 5.3    |
| Sloth basic (d=2)        | 3.0   | 3.0    | 3.6    | 5.7     | 1.4            | 4.1          | 1.9  | 2.7  | 10.2  | 1.7        | 2.2    | 4.2    |
| Sloth basic (d=3)        | 3.1   | 3.0    | 4.0    | 5.7     | 1.5            | 4.4          | 2.5  | 3.5  | 9.8   | 1.5        | 2.5    | 4.6    |
| Sloth basic (d=4)        | 2.9   | 2.9    | 4.1    | 5.8     | 1.5            | 6.4          | 2.6  | 5.0  | 10.1  | 1.8        | 2.3    | 4.6    |
| Sloth (d=1)              | 2.1   | 1.2    | 4.7    | 6.5     | 1.1            | 8.1          | 5.0  | 1.3  | 7.7   | 4.2        | 2.3    | 5.3    |
| Sloth (d=2)              | 3.0   | 1.3    | 4.2    | 4.2     | 1.2            | 4.8          | 0.7  | 0.9  | 5.0   | 3.4        | 1.6    | 3.9    |
| Sloth (d=3)              | 2.5   | 1.2    | 5.0    | 3.6     | 2.0            | 5.1          | 1.8  | 1.6  | 8.3   | 5.0        | 1.2    | 4.7    |
| Sloth (d=4)              | 2.0   | 1.4    | 4.3    | 4.3     | 0.9            | 5.0          | 3.4  | 1.3  | 8.4   | 2.9        | 1.6    | 4.1    |
|                          | bloom | pythia | falcon | gemma-2 | gpt-j-neo-neox | meta-llama-3 | olmo | opt  | qwen2 | starcoder2 | smollm | yi-1.5 |
