# Supplementary material
Source: ML conference proceedings conference paper supplement (https://openreview.net/forum?id=D5v491uCzm)
Supplement: supplementary_material [file attachment]

|                                      |      |     |           |            |            |       |        |     |            |      |      |          |         |
|--------------------------------------|------|-----|-----------|------------|------------|-------|--------|-----|------------|------|------|----------|---------|
| FLOPs (shared intercept)             | 9.7  | 5.1 | 5.4       | 4.3        | 6.6        | 11.4  | 7.9    | 5.3 | 4.8        | 2.7  | 2.6  | 7.5      | 6.1     |
| FLOPs                                | 5.6  | 3.9 | 2.6       | 2.7        | 7.1        | 5.3   | 4.2    | 3.5 | 2.2        | 2.2  | 4.7  | 5.4      | 4.1     |
| Size and Tokens                      | 4.8  | 3.7 | 3.1       | 2.5        | 4.8        | 6.4   | 4.1    | 2.2 | 6.6        | 2.2  | 2.6  | 6.3      | 4.1     |
| PCA + FLOPs (d=1)                    | 11.5 | 6.1 | 7.9       | 4.8        | 4.9        | 14.7  | 7.2    | 4.5 | 3.3        | 2.1  | 2.7  | 5.9      | 6.3     |
| PCA + FLOPs (d=2)                    | 11.2 | 5.1 | 5.2       | 3.4        | 5.2        | 15.3  | 7.2    | 4.4 | 2.9        | 2.2  | 2.7  | 5.9      | 5.9     |
| PCA + FLOPs (d=3)                    | 11.0 | 4.5 | 4.1       | 2.5        | 5.3        | 15.0  | 5.7    | 4.4 | 3.0        | 2.1  | 2.8  | 6.0      | 5.6     |
| PCA + FLOPs (d=4)                    | 12.0 | 4.5 | 4.4       | 2.3        | 6.3        | 13.3  | 3.9    | 5.9 | 3.1        | 2.4  | 2.9  | 7.5      | 5.7     |
| Sloth basic (d=1) (shared intercept) | 9.9  | 5.7 | 5.5       | 4.7        | 6.4        | 11.8  | 7.9    | 5.5 | 5.3        | 2.6  | 3.0  | 8.0      | 6.4     |
| Sloth basic (d=2) (shared intercept) | 9.2  | 6.1 | 5.7       | 3.8        | 6.8        | 9.8   | 7.9    | 5.7 | 5.6        | 2.8  | 3.1  | 7.6      | 6.2     |
| Sloth basic (d=3) (shared intercept) | 9.1  | 6.4 | 5.8       | 3.8        | 6.7        | 8.2   | 7.6    | 6.3 | 6.3        | 3.0  | 3.4  | 7.8      | 6.2     |
| Sloth basic (d=4) (shared intercept) | 9.1  | 6.4 | 5.8       | 3.8        | 6.8        | 8.3   | 7.6    | 6.3 | 6.4        | 3.3  | 3.7  | 7.8      | 6.3     |
| Sloth (d=1) (shared intercept)       | 8.0  | 5.2 | 6.7       | 4.7        | 5.9        | 10.7  | 7.8    | 4.5 | 3.2        | 2.3  | 3.1  | 6.7      | 5.7     |
| Sloth (d=2) (shared intercept)       | 8.2  | 4.7 | 4.9       | 3.8        | 5.2        | 9.9   | 8.1    | 4.3 | 10.5       | 2.6  | 2.4  | 7.5      | 6.0     |
| Sloth (d=3) (shared intercept)       | 7.4  | 4.7 | 4.9       | 4.1        | 5.6        | 9.8   | 8.6    | 4.0 | 3.2        | 2.4  | 2.2  | 6.9      | 5.3     |
| Sloth (d=4) (shared intercept)       | 8.0  | 5.0 | 4.8       | 4.2        | 5.4        | 9.4   | 8.1    | 3.8 | 3.0        | 2.2  | 2.2  | 6.0      | 5.2     |
| Sloth basic (d=1)                    | 11.3 | 7.0 | 7.7       | 5.6        | 6.6        | 15.9  | 8.6    | 5.0 | 3.0        | 2.3  | 2.4  | 6.7      | 6.8     |
| Sloth basic (d=2)                    | 7.9  | 5.8 | 6.0       | 3.9        | 4.4        | 8.9   | 8.4    | 3.3 | 2.0        | 2.2  | 1.9  | 4.7      | 4.9     |
| Sloth basic (d=3)                    | 7.5  | 5.8 | 6.1       | 3.8        | 4.6        | 8.6   | 4.0    | 3.4 | 2.3        | 1.9  | 2.2  | 4.3      | 4.5     |
| Sloth basic (d=4)                    | 6.7  | 6.0 | 6.2       | 3.8        | 8.4        | 7.1   | 3.9    | 4.0 | 2.3        | 1.8  | 4.1  | 4.3      | 4.9     |
| Sloth (d=1)                          | 8.6  | 5.1 | 7.2       | 5.3        | 4.3        | 12.3  | 6.7    | 2.8 | 2.9        | 2.0  | 1.7  | 4.4      | 5.3     |
| Sloth (d=2)                          | 5.8  | 3.8 | 5.0       | 3.3        | 5.1        | 7.5   | 7.2    | 2.6 | 2.2        | 2.2  | 1.9  | 3.3      | 4.2     |
| Sloth (d=3)                          | 5.4  | 3.0 | 4.4       | 3.1        | 5.0        | 6.4   | 4.7    | 2.5 | 1.6        | 2.2  | 1.5  | 2.5      | 3.5     |
| Sloth (d=4)                          | 5.4  | 4.0 | 5.0       | 2.9        | 6.5        | 6.8   | 4.1    | 1.8 | 2.8        | 2.1  | 3.8  | 3.8      | 4.1     |
|                                      | MMLU | ARC | HellaSwag | Winogrande | TruthfulQA | GSM8K | IFEval | BBH | MATH Lvl 5 | GPQA | MUSR | MMLU-PRO | Average |
