# Supplementary material
Source: ML conference proceedings conference paper supplement (https://openreview.net/forum?id=D5v491uCzm)
Supplement: supplementary_material [file attachment]

Open LLM Leaderboard v2

|                   |        |     |            |      |      |          |         |
|-------------------|--------|-----|------------|------|------|----------|---------|
| FLOPs             | 13.9   | 7.4 | 26.6       | 4.8  | 9.8  | 8.6      | 11.9    |
| Size and Tokens   | 7.1    | 2.2 | 4.6        | 4.2  | 3.9  | 1.8      | 4.0     |
| PCA + FLOPs (d=1) | 9.0    | 8.1 | 4.1        | 1.7  | 3.9  | 8.2      | 5.8     |
| PCA + FLOPs (d=2) | 11.3   | 6.8 | 4.5        | 1.4  | 3.5  | 6.0      | 5.6     |
| PCA + FLOPs (d=3) | 11.2   | 7.0 | 3.3        | 1.4  | 3.8  | 6.1      | 5.5     |
| PCA + FLOPs (d=4) | 11.2   | 6.9 | 3.2        | 1.3  | 10.6 | 6.5      | 6.6     |
| Sloth basic (d=1) | 8.3    | 5.7 | 3.3        | 1.4  | 3.2  | 5.0      | 4.5     |
| Sloth basic (d=2) | 4.9    | 4.8 | 3.2        | 1.4  | 3.2  | 4.5      | 3.7     |
| Sloth basic (d=3) | 4.8    | 4.6 | 6.4        | 2.0  | 3.6  | 4.2      | 4.3     |
| Sloth basic (d=4) | 4.7    | 3.9 | 6.8        | 2.5  | 3.1  | 4.7      | 4.3     |
| Sloth (d=1)       | 8.1    | 4.4 | 7.9        | 1.5  | 2.8  | 4.3      | 4.8     |
| Sloth (d=2)       | 5.1    | 4.3 | 8.2        | 2.0  | 2.8  | 2.3      | 4.1     |
| Sloth (d=3)       | 6.7    | 2.4 | 3.8        | 1.7  | 5.4  | 1.8      | 3.6     |
| Sloth (d=4)       | 5.8    | 2.1 | 5.1        | 1.6  | 3.3  | 1.6      | 3.2     |
|                   | IFEval | BBH | MATH Lvl 5 | GPQA | MUSR | MMLU-PRO | Average |
