# Supplementary material
Source: ML conference proceedings conference paper supplement (https://openreview.net/forum?id=D5v491uCzm)
Supplement: supplementary_material [file attachment]

OpenLLM Leaderboard v2

|                                      |            |            |            |            |            |            |            |
|--------------------------------------|------------|------------|------------|------------|------------|------------|------------|
| FLOPs (shared intercept)             | 9.4        | 4.5        | 4.2        | 2.6        | 2.8        | 5.6        | 4.9        |
| FLOPs                                | 5.1        | 3.6        | 2.6        | 2.5        | 4.4        | 4.5        | 3.8        |
| Size and Tokens                      | 4.9        | 3.8        | 3.3        | 3.0        | 2.8        | 6.8        | 4.1        |
| PCA + FLOPs (d=1)                    | 9.3        | 7.3        | 4.4        | 2.7        | 3.2        | 9.4        | 6.0        |
| PCA + FLOPs (d=2)                    | 6.1        | 7.4        | 4.3        | 2.7        | 2.8        | 9.3        | 5.4        |
| PCA + FLOPs (d=3)                    | 6.1        | 7.1        | 5.3        | 2.7        | 2.6        | 9.1        | 5.5        |
| PCA + FLOPs (d=4)                    | 6.1        | 7.1        | 5.5        | 2.7        | 3.7        | 8.9        | 5.7        |
| Sloth basic (d=1) (shared intercept) | 10.5       | 5.1        | 5.2        | 2.8        | 2.8        | 6.2        | 5.4        |
| Sloth basic (d=2) (shared intercept) | 11.3       | 5.0        | 5.5        | 3.0        | 3.0        | 5.6        | 5.6        |
| Sloth basic (d=3) (shared intercept) | 11.2       | 5.1        | 5.6        | 3.1        | 2.9        | 5.5        | 5.6        |
| Sloth basic (d=4) (shared intercept) | 11.3       | 5.2        | 5.6        | 3.0        | 3.0        | 5.4        | 5.6        |
| Sloth (d=1) (shared intercept)       | 10.0       | 4.9        | 3.4        | 2.5        | 3.9        | 5.6        | 5.0        |
| Sloth (d=2) (shared intercept)       | 10.2       | 4.2        | 3.0        | 2.3        | 2.4        | 5.0        | 4.5        |
| Sloth (d=3) (shared intercept)       | 10.2       | 3.4        | 3.1        | 2.1        | 3.3        | 5.3        | 4.6        |
| Sloth (d=4) (shared intercept)       | 10.1       | 3.4        | 3.5        | 2.2        | 3.6        | 5.2        | 4.7        |
| Sloth basic (d=1)                    | 9.2        | 6.0        | 3.8        | 2.3        | 2.3        | 7.5        | 5.2        |
| Sloth basic (d=2)                    | <b>4.8</b> | 4.1        | 3.2        | 2.2        | <b>1.9</b> | 5.6        | 3.6        |
| Sloth basic (d=3)                    | <b>4.8</b> | 4.3        | 2.9        | 2.2        | 3.0        | 5.7        | 3.8        |
| Sloth basic (d=4)                    | <b>4.8</b> | 5.0        | 3.8        | 2.2        | 3.3        | 5.9        | 4.2        |
| Sloth (d=1)                          | 9.9        | 4.2        | 2.6        | <b>1.9</b> | 2.0        | 4.2        | 4.1        |
| Sloth (d=2)                          | 4.9        | 2.6        | <b>2.3</b> | 2.5        | 2.2        | <b>2.6</b> | <b>2.9</b> |
| Sloth (d=3)                          | <b>4.8</b> | 2.5        | 4.1        | 2.4        | 4.0        | 3.1        | 3.5        |
| Sloth (d=4)                          | <b>4.8</b> | <b>2.4</b> | 4.3        | 2.0        | 2.9        | 3.5        | 3.3        |
|                                      | IFEval     | BBH        | MATH Lvl 5 | GPQA       | MUSR       | MMLU-PRO   | Average    |
