# Supplementary material
Source: ML conference proceedings conference paper supplement (https://openreview.net/forum?id=D5v491uCzm)
Supplement: supplementary_material [file attachment]

Open LLM Leaderboard v1/v2 (Average error across benchmarks)

|                   | bloom | llama-2 | pythia | qwen1.5 | qwen2 | starcoder2 | yi-1.5 |
|-------------------|-------|---------|--------|---------|-------|------------|--------|
| FLOPs             | 6.7   | 7.3     | 19.7   | 9.2     | 17.2  | 6.1        | 11.6   |
| Size and Tokens   | 2.1   | 3.9     | 7.2    | 7.9     | 8.2   | 3.0        | 4.3    |
| PCA + FLOPs (d=1) | 3.0   | 6.7     | 4.0    | 5.5     | 26.6  | 5.5        | 10.5   |
| PCA + FLOPs (d=2) | 3.4   | 5.1     | 3.4    | 5.2     | 25.4  | 5.9        | 9.8    |
| PCA + FLOPs (d=3) | 3.7   | 5.9     | 3.1    | 5.5     | 24.9  | 6.0        | 9.9    |
| PCA + FLOPs (d=4) | 3.6   | 5.3     | 4.0    | 6.8     | 24.8  | 5.9        | 10.0   |
| Sloth basic (d=1) | 3.6   | 6.8     | 4.3    | 10.5    | 9.8   | 6.6        | 5.4    |
| Sloth basic (d=2) | 3.5   | 6.2     | 4.7    | 8.7     | 7.0   | 4.7        | 5.1    |
| Sloth basic (d=3) | 3.0   | 5.4     | 5.2    | 9.0     | 5.9   | 4.3        | 4.8    |
| Sloth basic (d=4) | 2.1   | 4.9     | 2.4    | 9.3     | 7.1   | 4.6        | 4.8    |
| Sloth (d=1)       | 3.7   | 7.7     | 6.2    | 6.7     | 8.4   | 7.5        | 3.8    |
| Sloth (d=2)       | 3.3   | 6.9     | 4.4    | 6.6     | 4.0   | 4.2        | 4.2    |
| Sloth (d=3)       | 2.2   | 3.9     | 3.9    | 7.5     | 4.8   | 2.7        | 3.1    |
| Sloth (d=4)       | 1.6   | 4.4     | 3.4    | 6.8     | 4.8   | 4.1        | 2.5    |
