# Supplementary material
Source: ML conference proceedings conference paper supplement (https://openreview.net/forum?id=D5v491uCzm)
Supplement: supplementary_material [file attachment]

Open LLM Leaderboard v2 (Average error across benchmarks)

|                                      |       |         |              |        |         |       |        |            |        |
|--------------------------------------|-------|---------|--------------|--------|---------|-------|--------|------------|--------|
| FLOPs                                | 10.5  | 5.3     | 20.4         | 13.3   | 11.4    | 23.1  | 1.9    | 4.6        | 16.2   |
| Size and Tokens                      | 1.2   | 3.7     | 4.0          | 2.0    | 5.1     | 7.3   | 1.5    | 3.7        | 7.2    |
| PCA + FLOPs (d=1)                    | 3.9   | 6.4     | 5.7          | 2.2    | 6.0     | 10.3  | 2.3    | 3.5        | 12.4   |
| PCA + FLOPs (d=2)                    | 4.8   | 3.9     | 5.8          | 3.0    | 5.6     | 9.6   | 2.0    | 3.5        | 12.2   |
| PCA + FLOPs (d=3)                    | 4.6   | 3.0     | 4.8          | 2.7    | 5.4     | 9.4   | 1.9    | 3.3        | 14.1   |
| PCA + FLOPs (d=4)                    | 5.6   | 4.7     | 5.6          | 4.9    | 6.4     | 12.4  | 2.0    | 4.1        | 13.7   |
| Sloth basic (d=1) (shared intercept) | 2.3   | 7.3     | 5.0          | 1.6    | 3.2     | 10.3  | 1.8    | 6.5        | 6.8    |
| Sloth basic (d=2) (shared intercept) | 2.6   | 7.4     | 4.8          | 1.7    | 3.3     | 12.1  | 1.8    | 6.8        | 6.8    |
| Sloth basic (d=3) (shared intercept) | 2.6   | 7.2     | 4.7          | 1.5    | 3.3     | 13.0  | 2.0    | 6.6        | 7.4    |
| Sloth basic (d=4) (shared intercept) | 2.6   | 7.1     | 4.6          | 1.5    | 3.3     | 13.0  | 2.0    | 6.7        | 7.3    |
| Sloth (d=1) (shared intercept)       | 2.1   | 7.0     | 5.4          | 1.5    | 4.9     | 7.7   | 1.5    | 7.5        | 6.7    |
| Sloth (d=2) (shared intercept)       | 2.5   | 6.9     | 4.5          | 1.5    | 4.5     | 7.4   | 1.4    | 8.8        | 7.3    |
| Sloth (d=3) (shared intercept)       | 2.5   | 6.9     | 5.2          | 1.4    | 4.4     | 6.9   | 1.4    | 9.0        | 7.3    |
| Sloth (d=4) (shared intercept)       | 2.5   | 6.8     | 5.1          | 1.4    | 4.4     | 6.5   | 1.4    | 8.8        | 7.1    |
| Sloth basic (d=1)                    | 1.4   | 5.7     | 5.3          | 1.6    | 8.0     | 6.9   | 2.0    | 3.0        | 6.6    |
| Sloth basic (d=2)                    | 1.6   | 3.7     | 4.6          | 2.5    | 6.4     | 5.4   | 1.5    | 2.3        | 5.0    |
| Sloth basic (d=3)                    | 1.8   | 3.4     | 4.3          | 2.7    | 5.7     | 12.0  | 2.2    | 1.5        | 4.7    |
| Sloth basic (d=4)                    | 1.5   | 3.6     | 4.0          | 2.5    | 5.7     | 12.6  | 1.7    | 2.3        | 4.6    |
| Sloth (d=1)                          | 1.8   | 6.0     | 5.0          | 1.2    | 6.7     | 11.4  | 3.5    | 1.8        | 6.1    |
| Sloth (d=2)                          | 1.4   | 4.7     | 4.7          | 1.6    | 4.4     | 11.2  | 1.0    | 2.2        | 6.0    |
| Sloth (d=3)                          | 2.3   | 4.2     | 4.2          | 2.0    | 3.9     | 6.4   | 1.9    | 2.6        | 5.0    |
| Sloth (d=4)                          | 1.9   | 3.3     | 2.8          | 1.6    | 4.8     | 7.0   | 1.4    | 2.3        | 4.1    |
|                                      | bloom | llama-2 | orca_mini_v3 | pythia | qwen1.5 | qwen2 | smollm | starcoder2 | yi-1.5 |
