# Supplementary material
Source: ML conference proceedings conference paper supplement (https://openreview.net/forum?id=D5v491uCzm)

# Open LLM Leaderboard v2

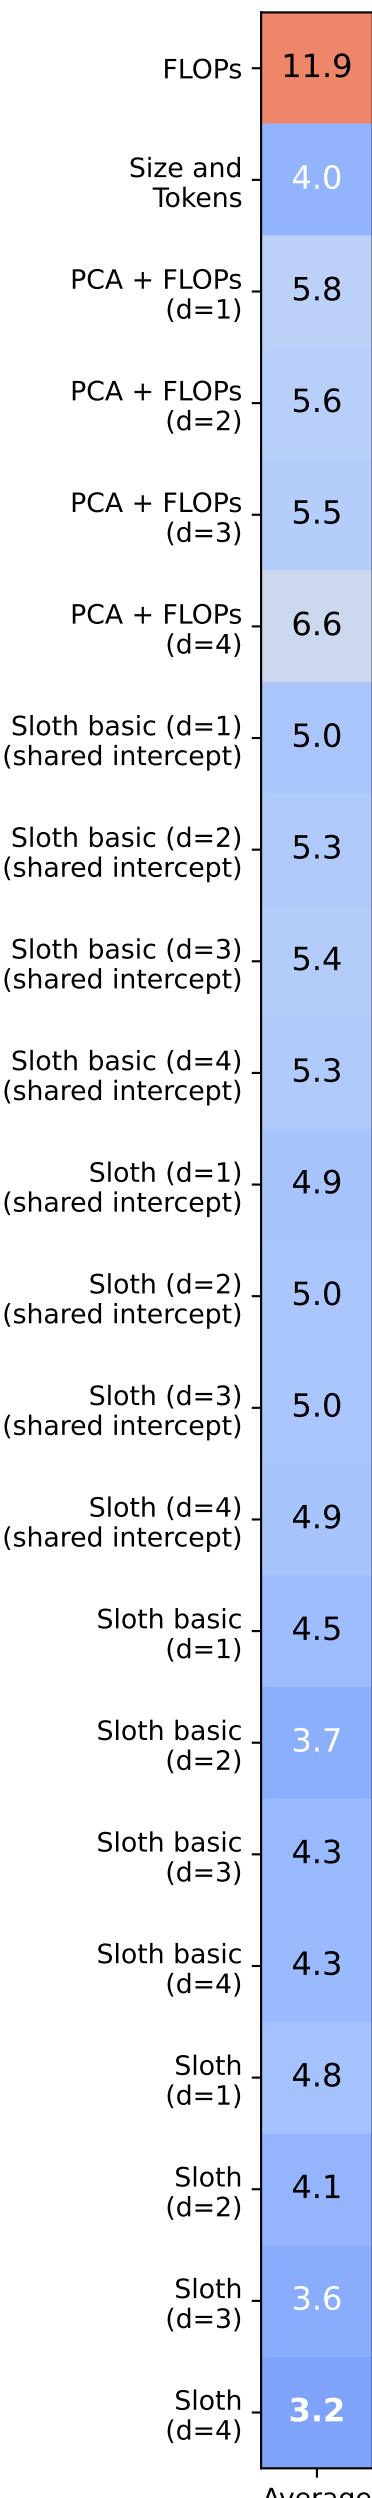

Supplement: supplementary_material [file attachment]

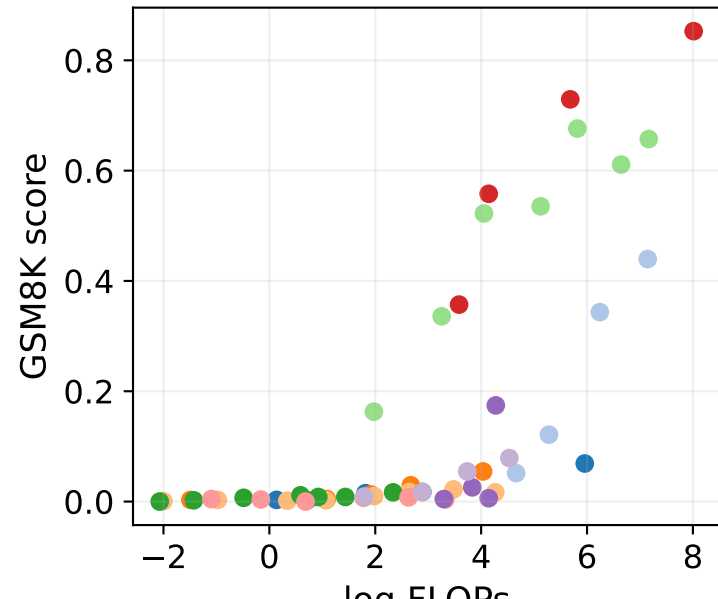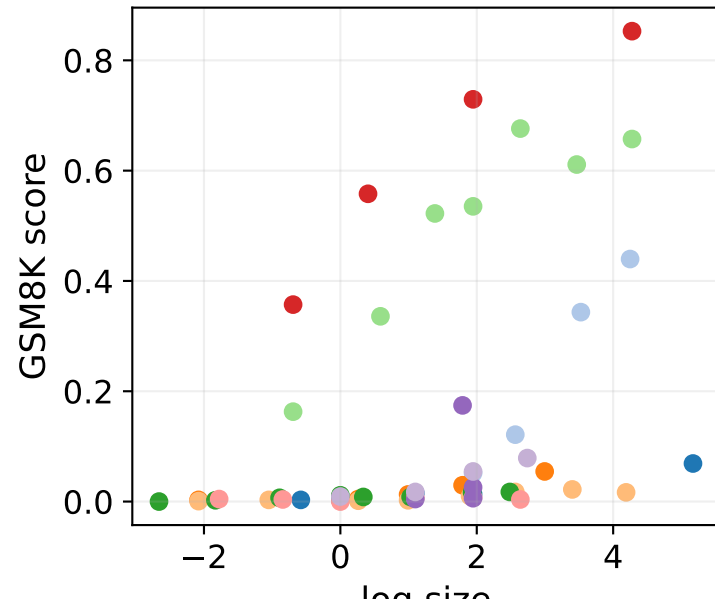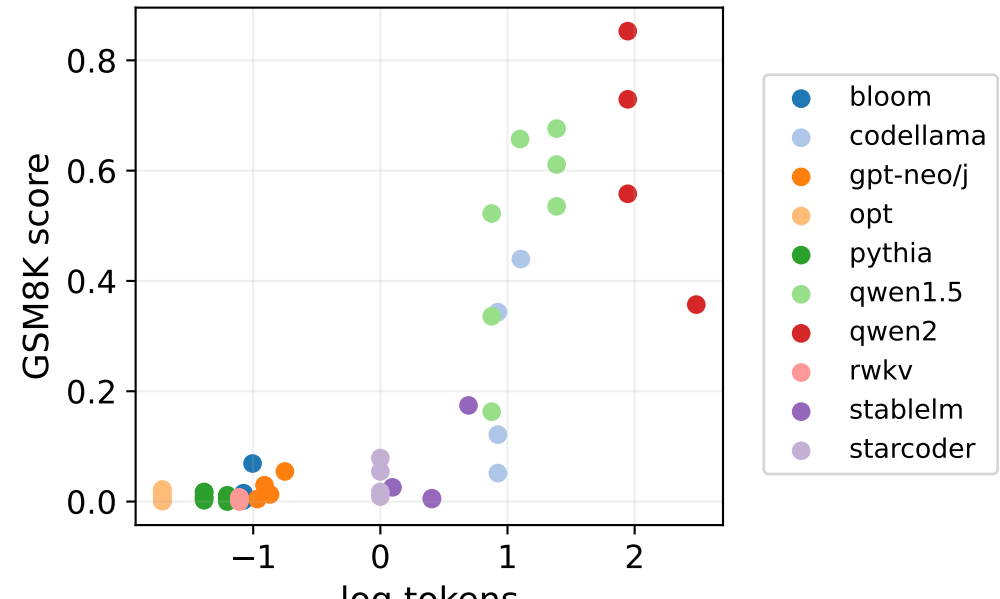

Supplement: supplementary_material [file attachment]

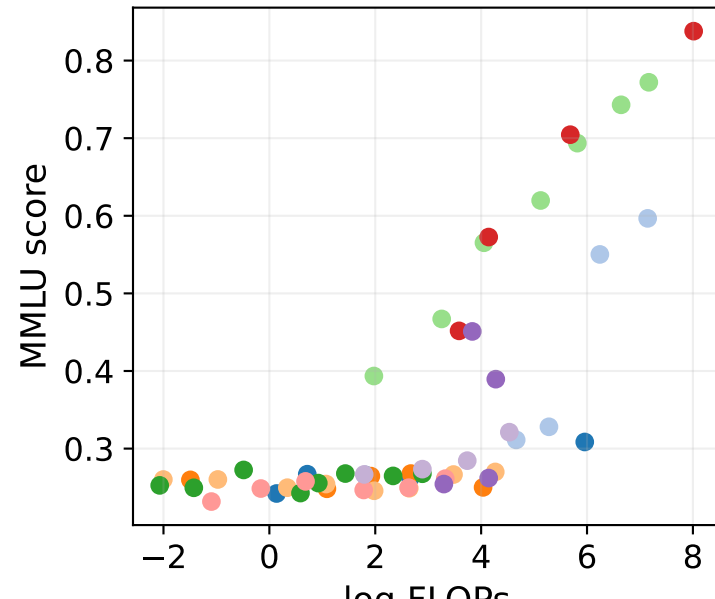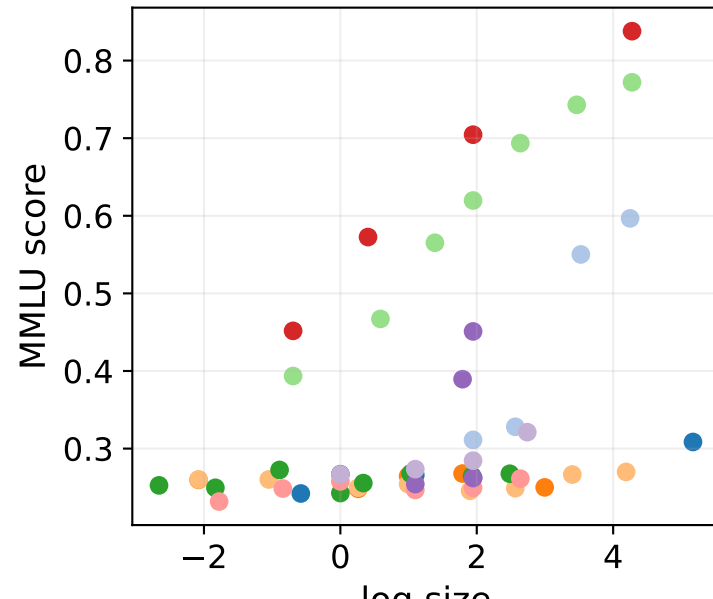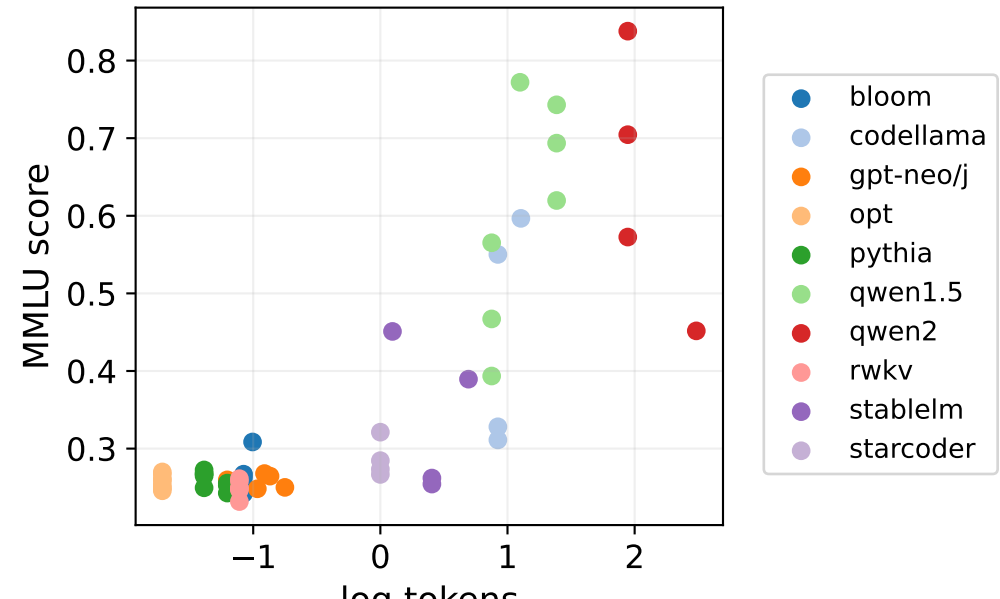

Supplement: supplementary_material [file attachment]

# Open LLM Leaderboard v1

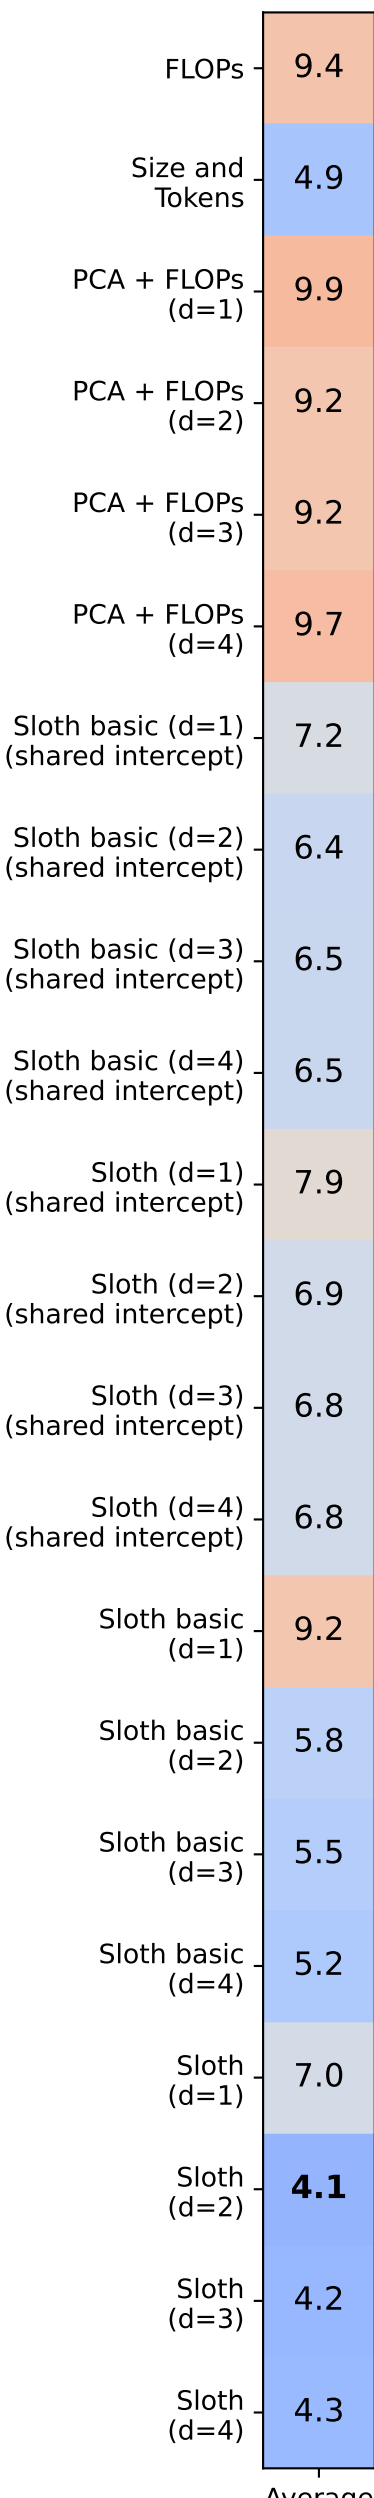

Supplement: supplementary_material [file attachment]

# Open LLM Leaderboard v1

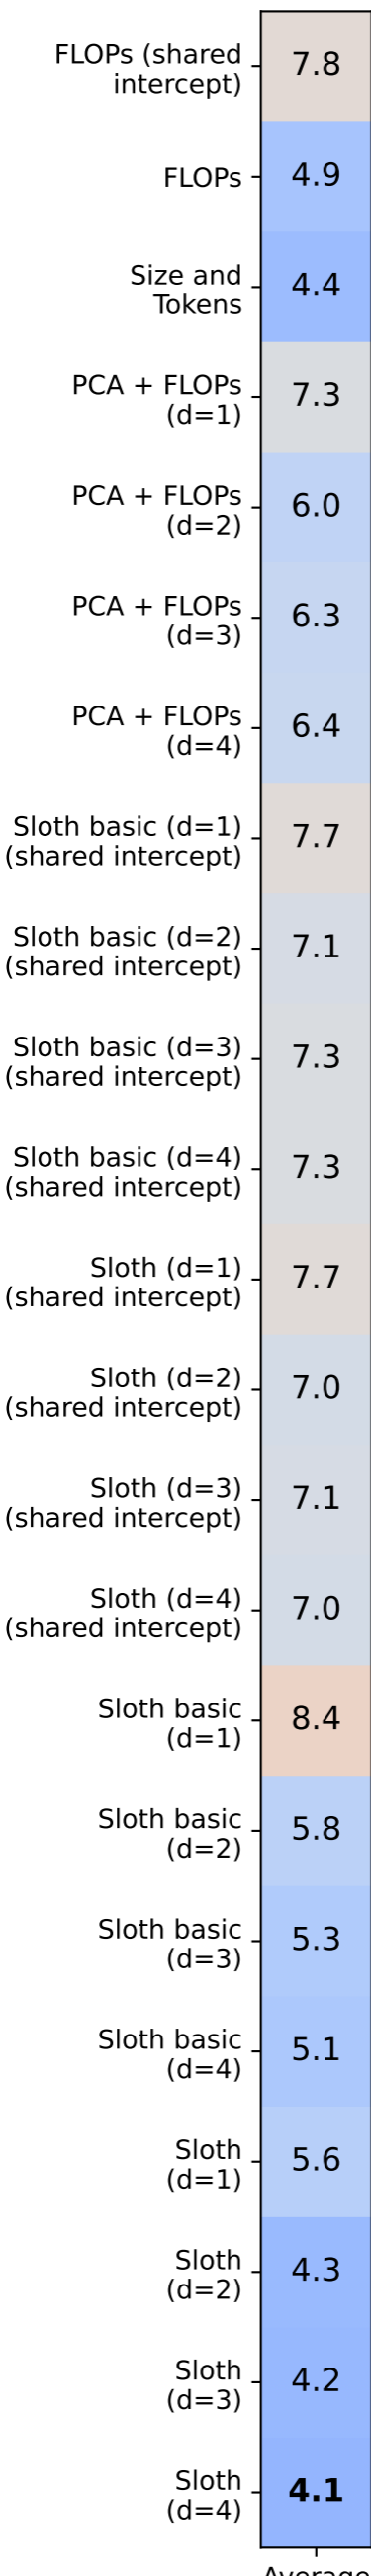

Supplement: supplementary_material [file attachment]

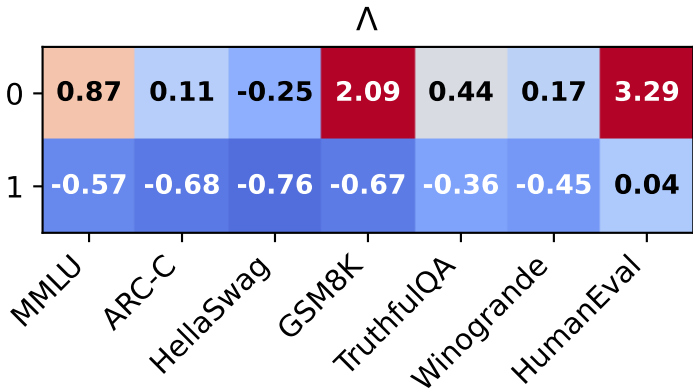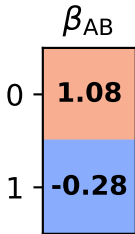

Supplement: supplementary_material [file attachment]

# Open LLM Leaderboard v2

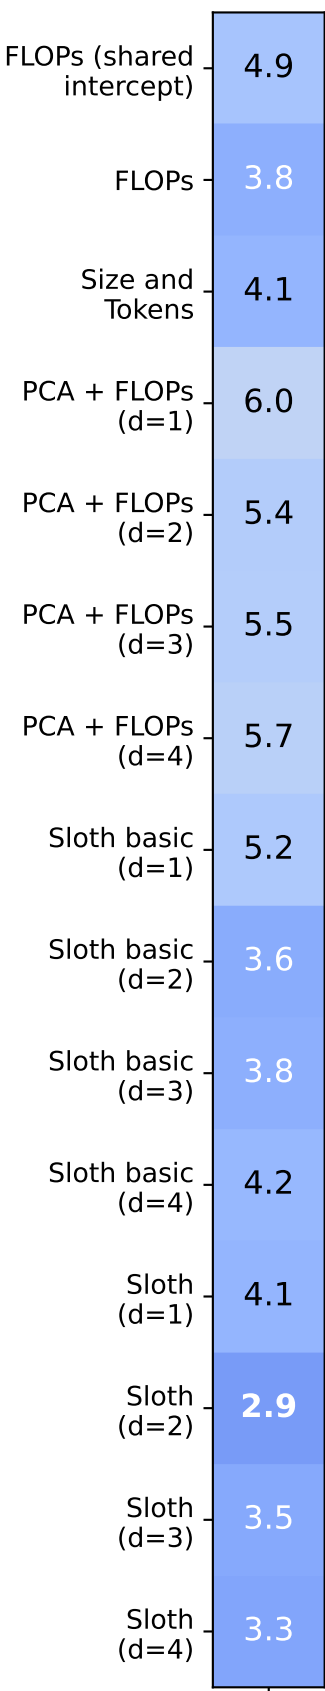

Supplement: supplementary_material [file attachment]

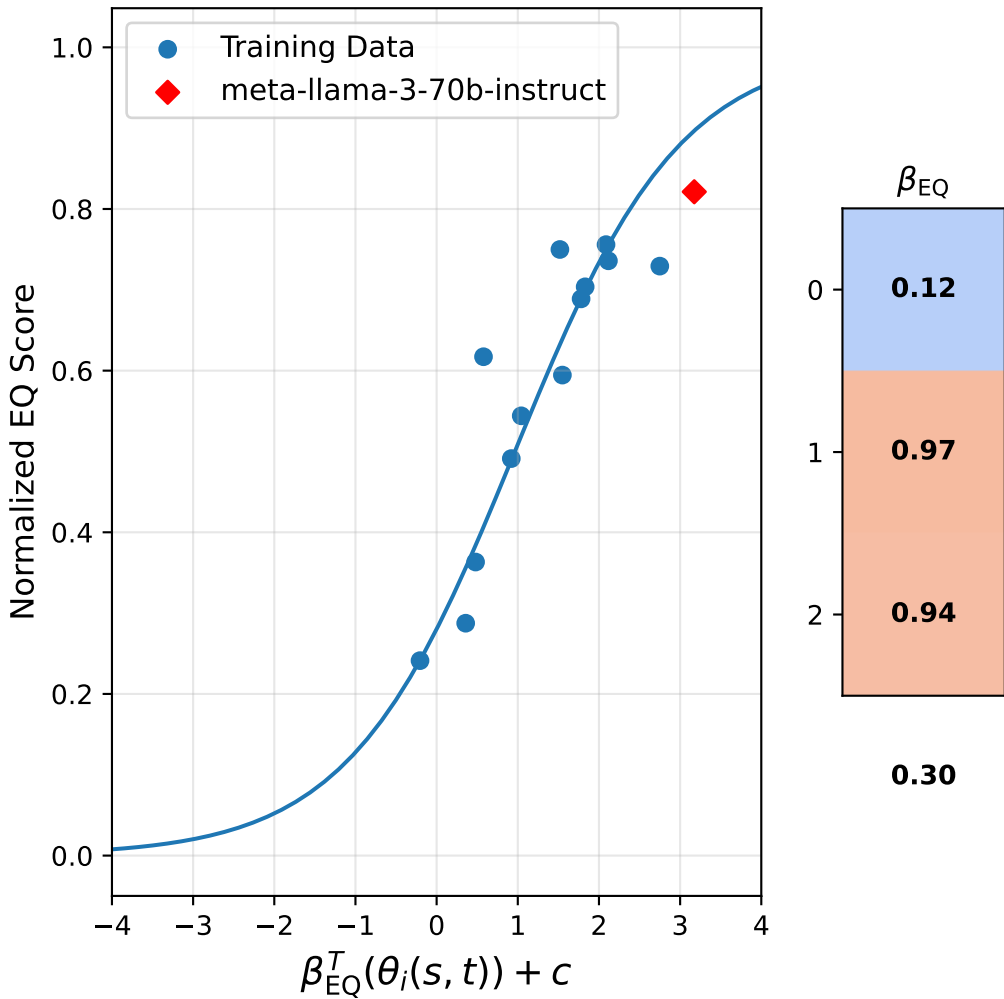

Supplement: supplementary_material [file attachment]

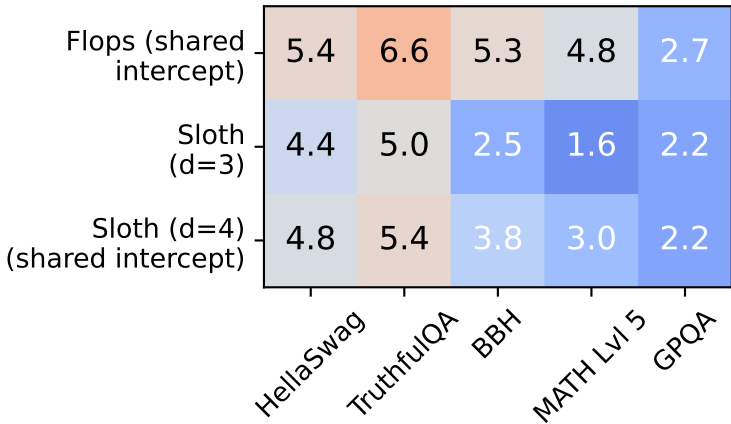

Supplement: supplementary_material [file attachment]

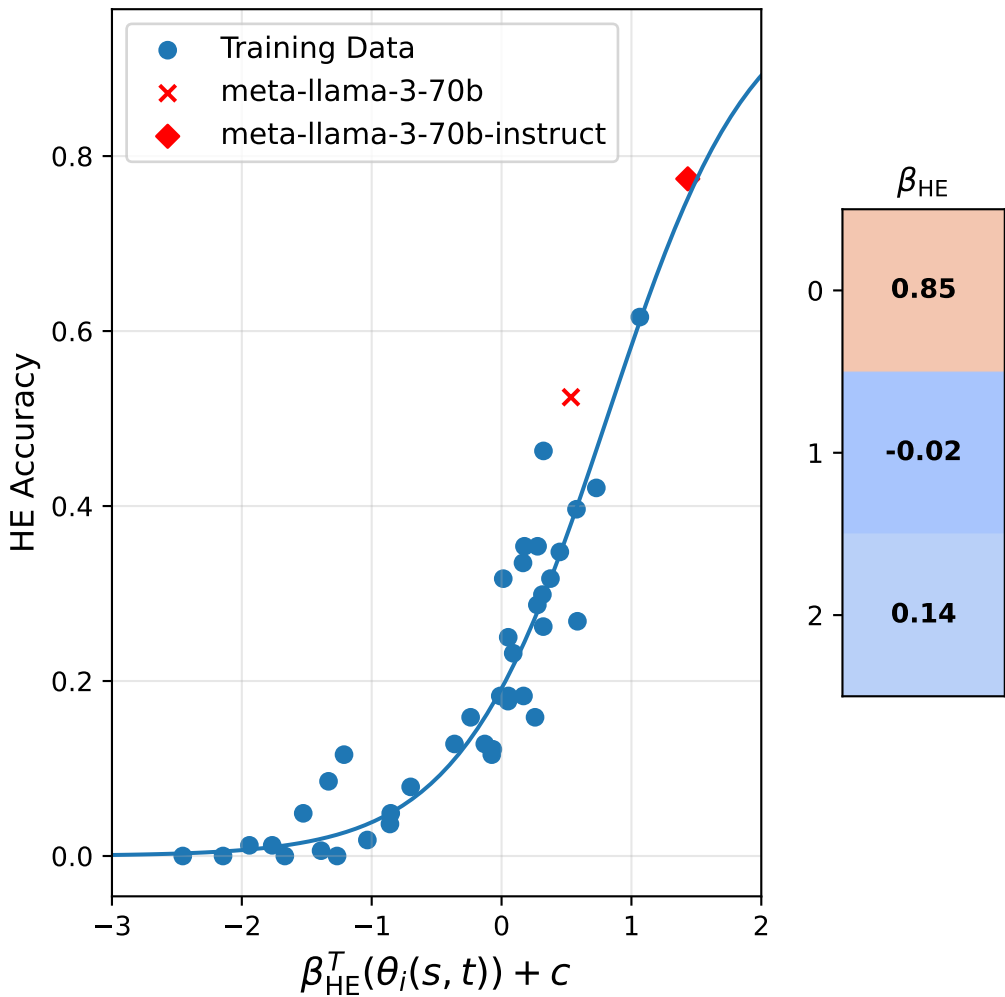

Supplement: supplementary_material [file attachment]

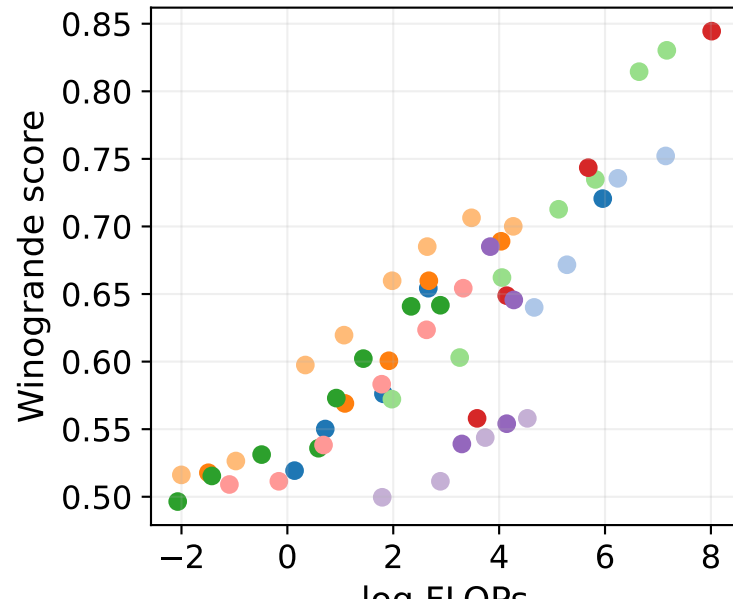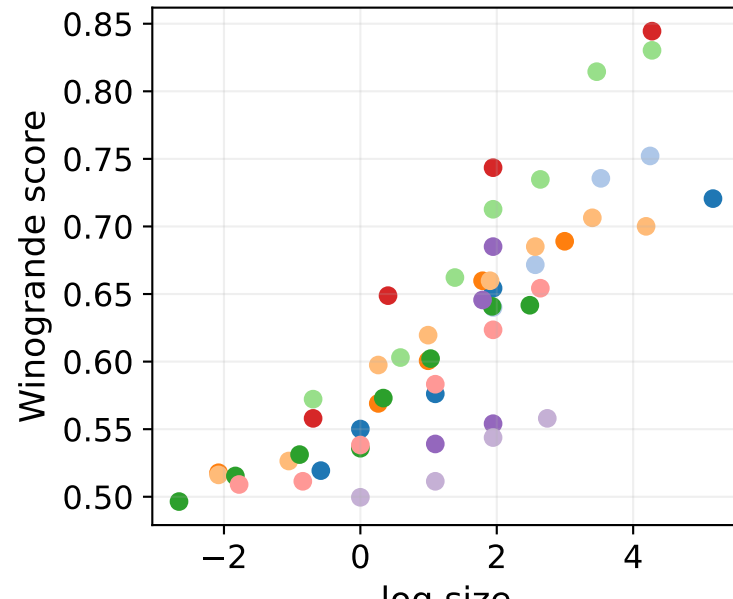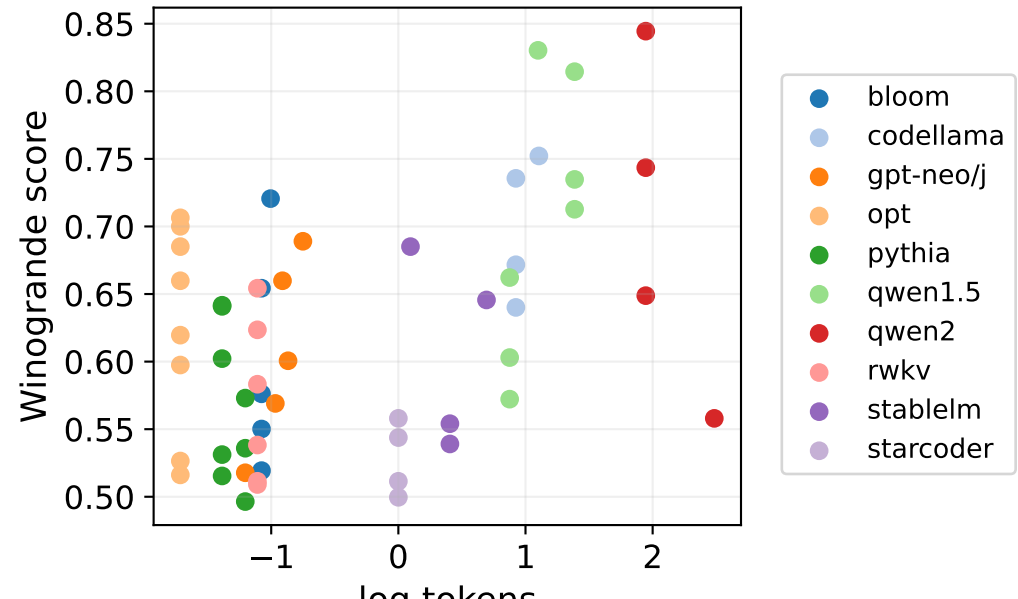

Supplement: supplementary_material [file attachment]

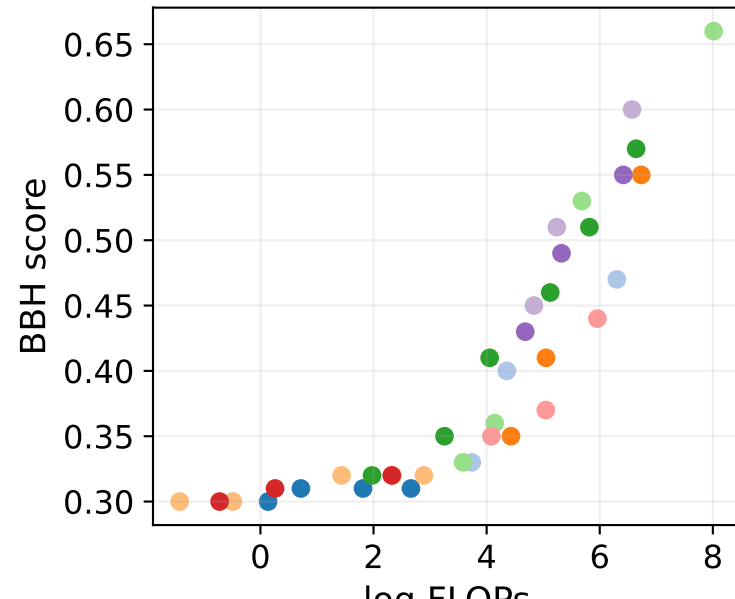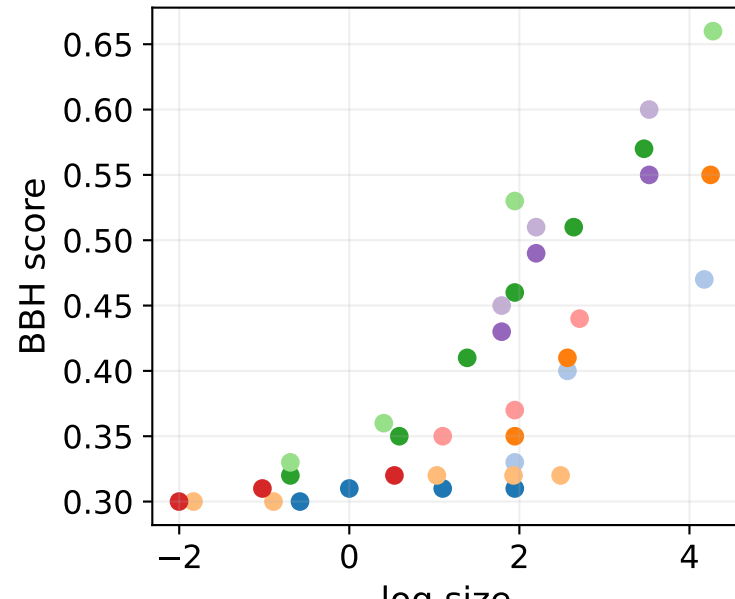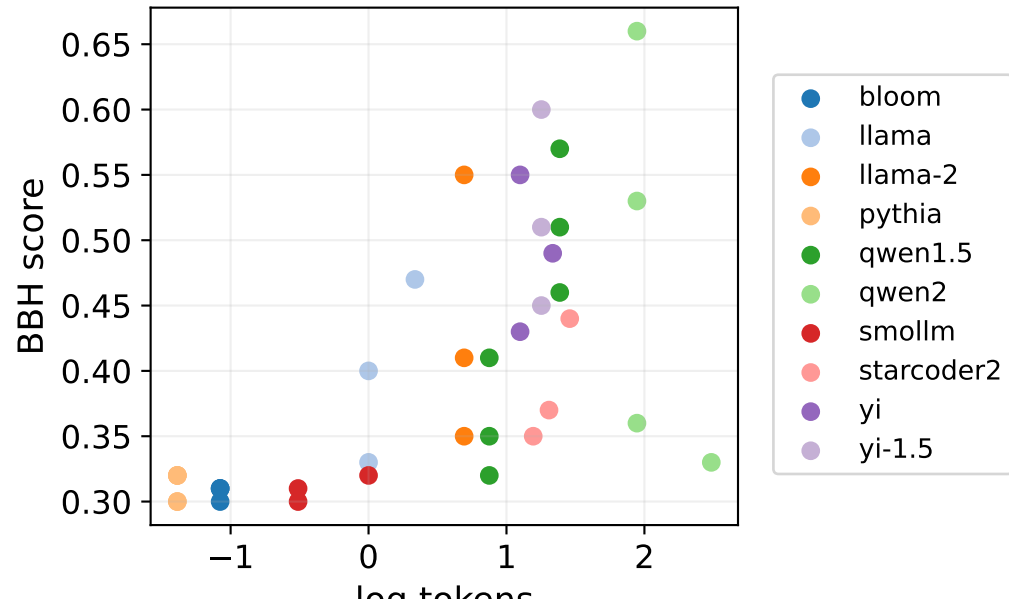

Supplement: supplementary_material [file attachment]

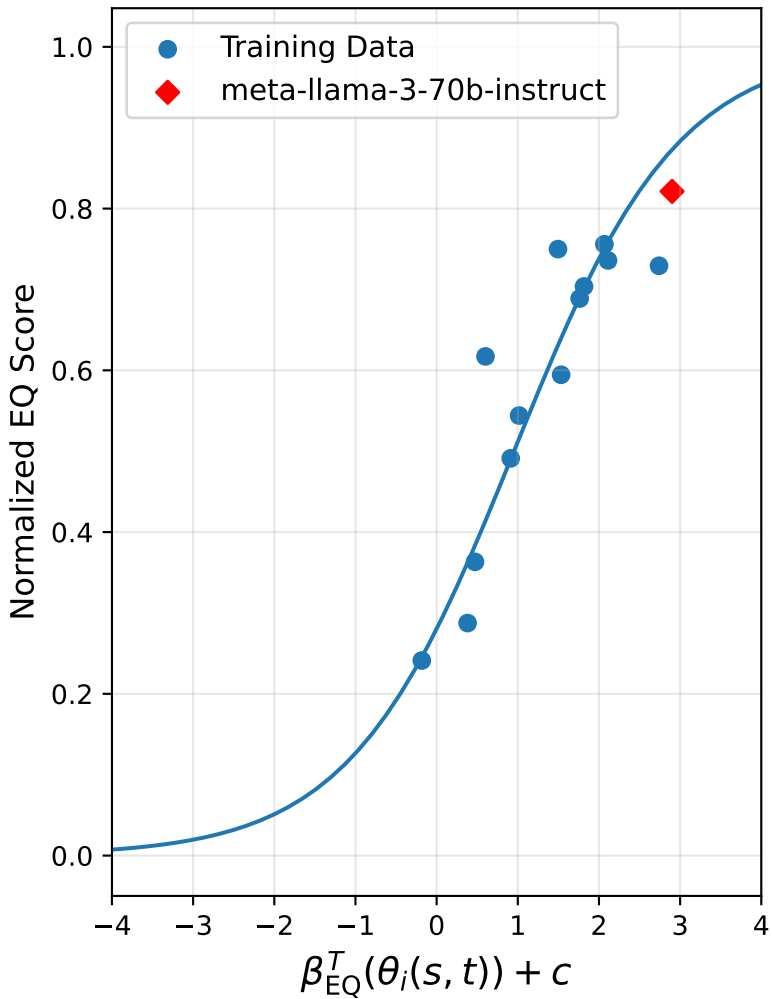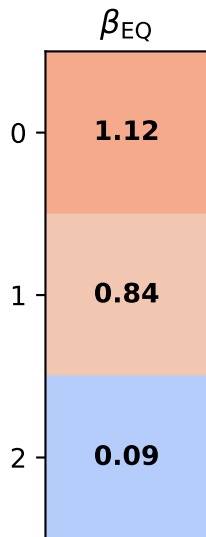

Supplement: supplementary_material [file attachment]

# Open LLM Leaderboard v1/v2

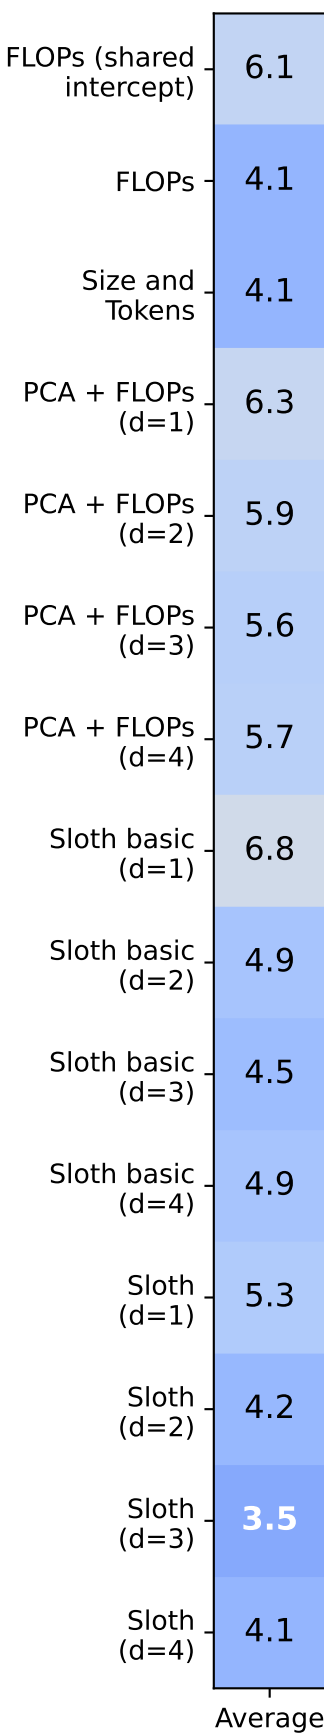

Average

Supplement: supplementary_material [file attachment]

# Open LLM Leaderboard v1/v2

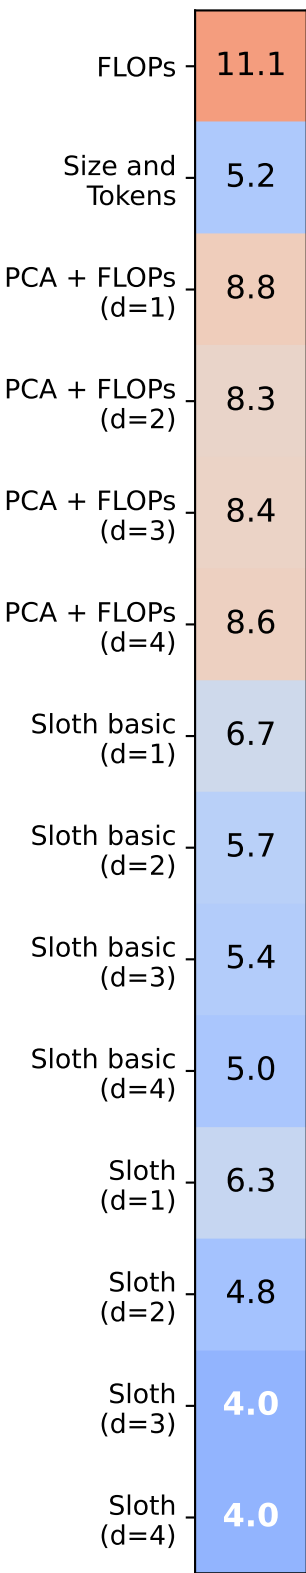

Average

Supplement: supplementary_material [file attachment]

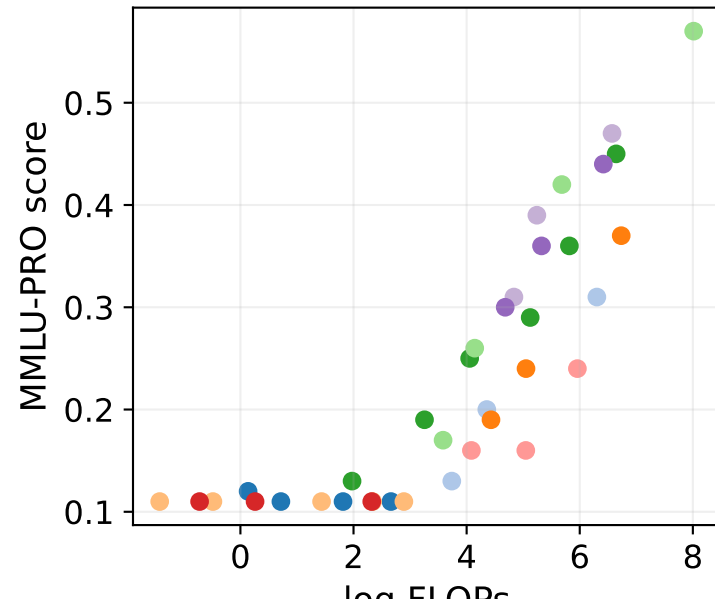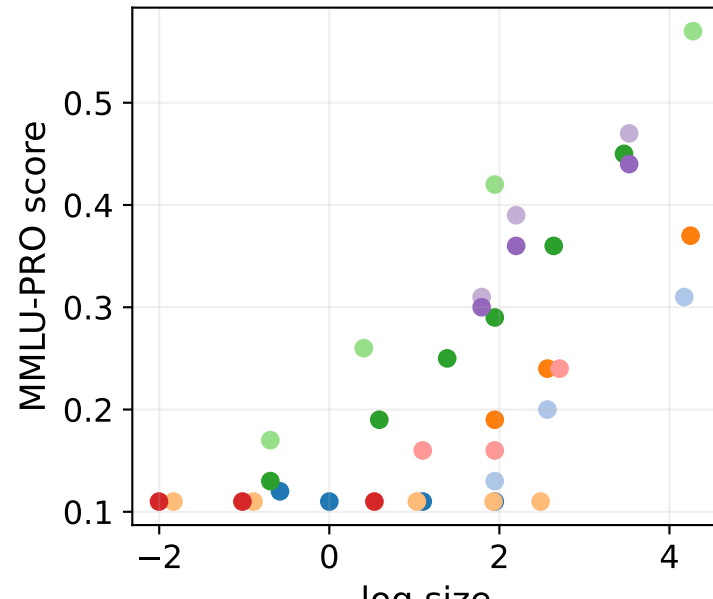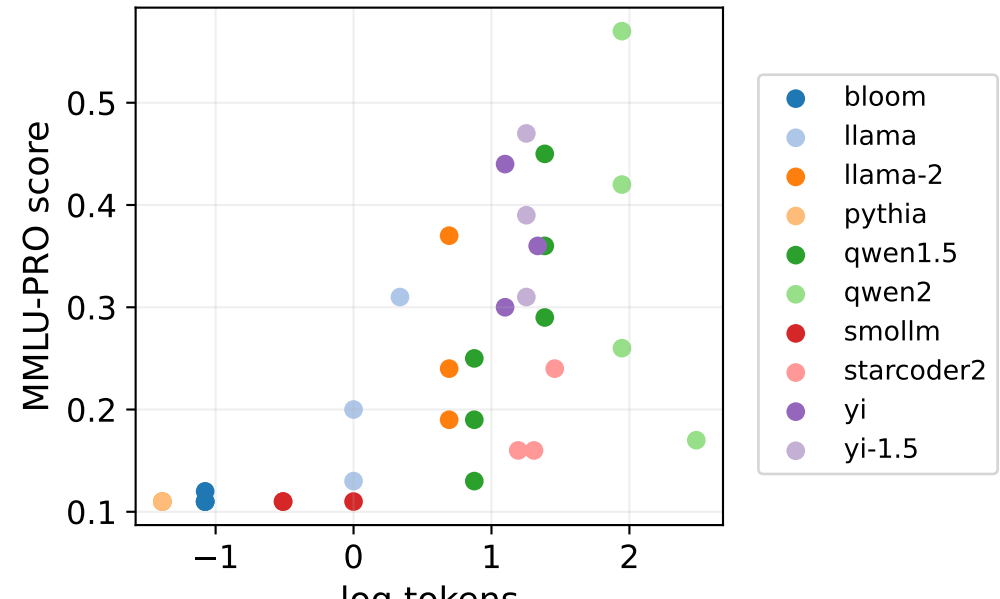

Supplement: supplementary_material [file attachment]

# Open LLM Leaderboard v2

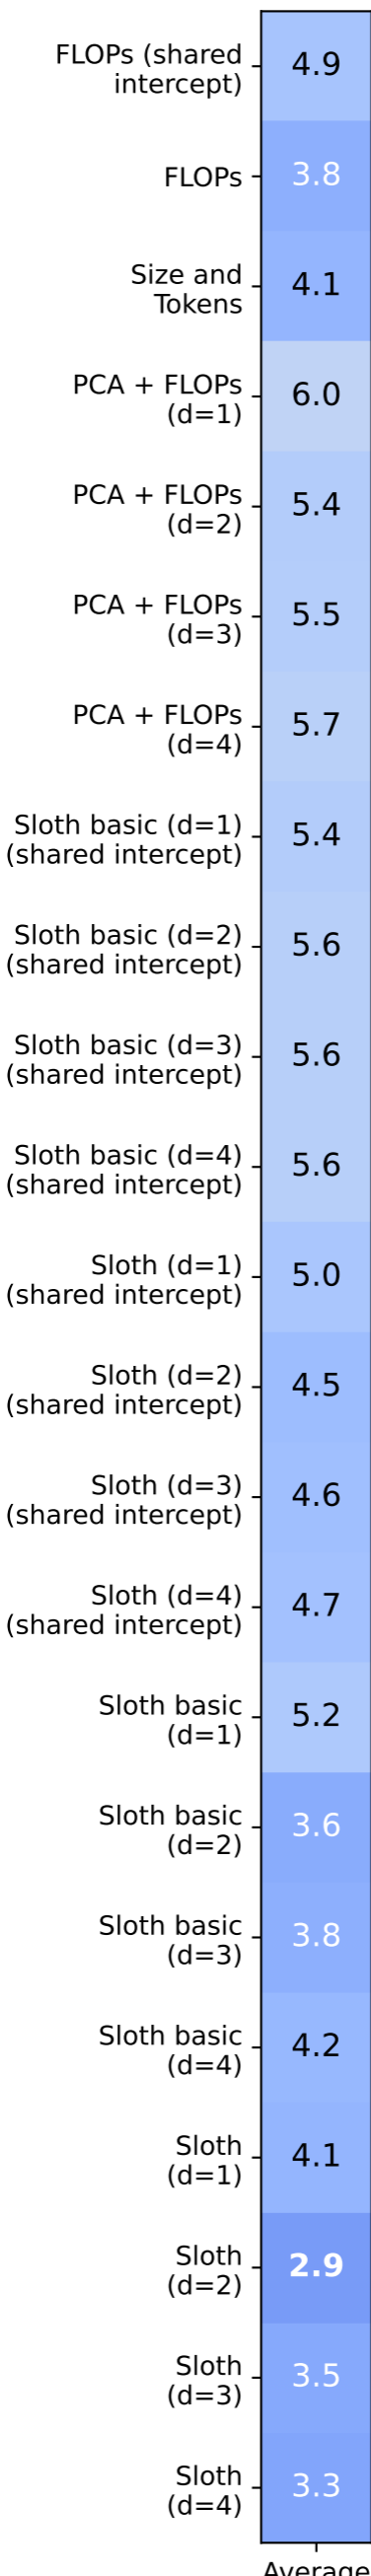

Average

Supplement: supplementary_material [file attachment]

# Open LLM Leaderboard v1/v2

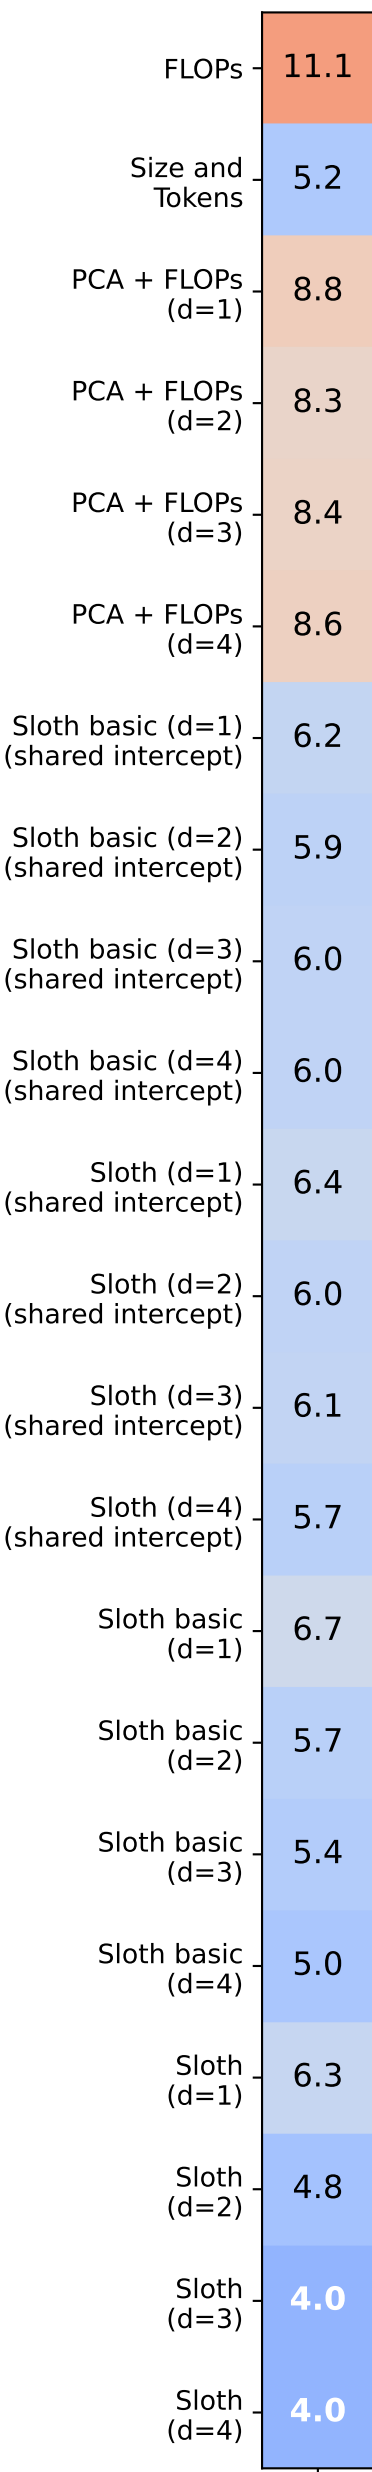

Average

Supplement: supplementary_material [file attachment]

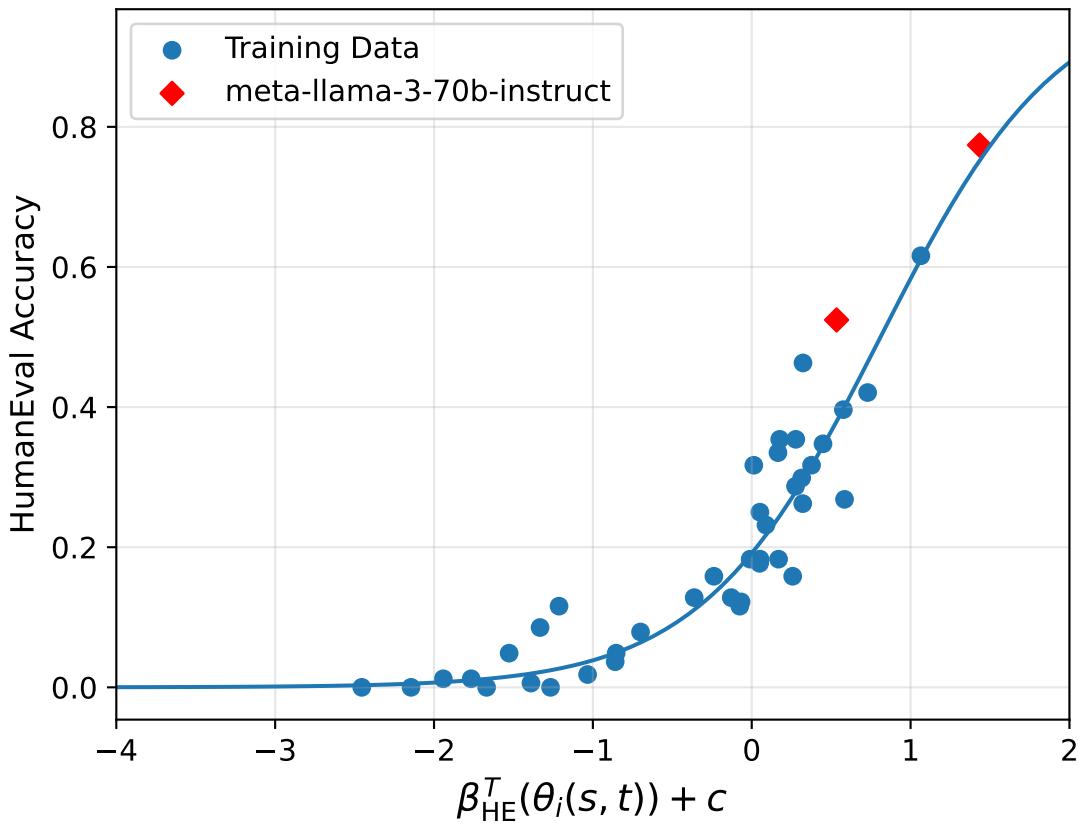

Supplement: supplementary_material [file attachment]

# Open LLM Leaderboard v2

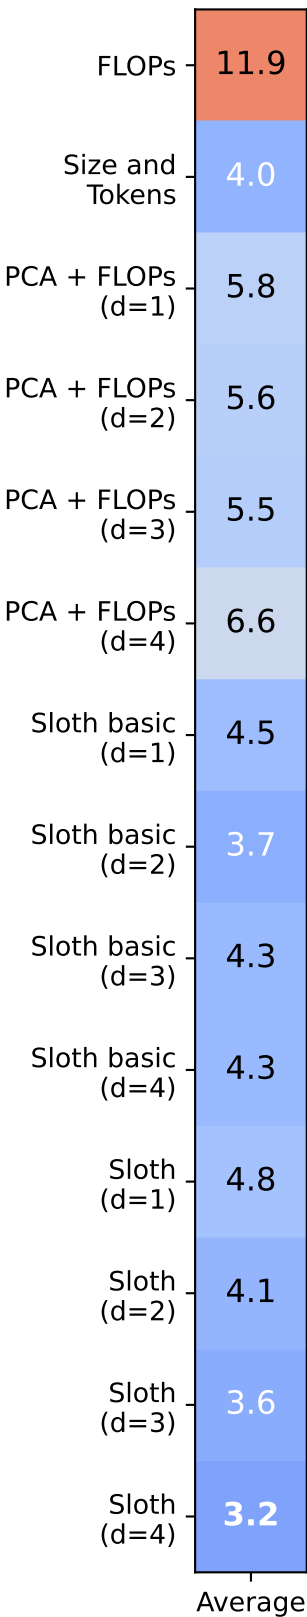

Supplement: supplementary_material [file attachment]

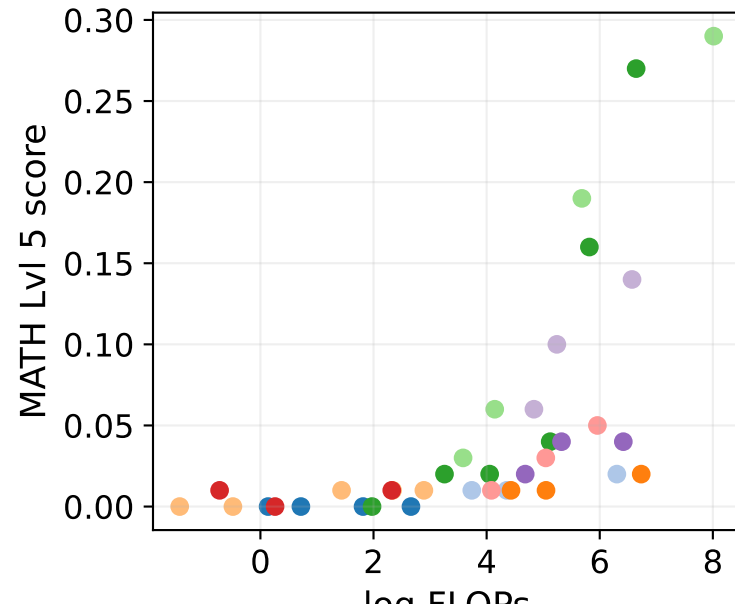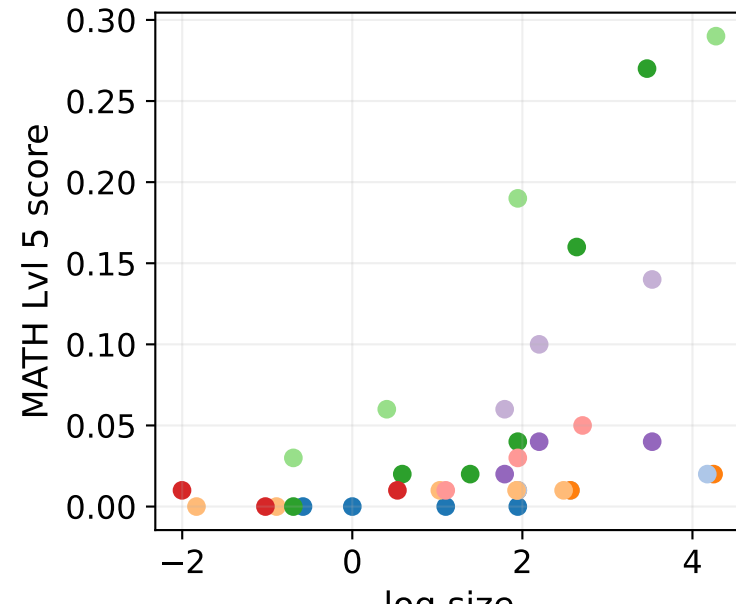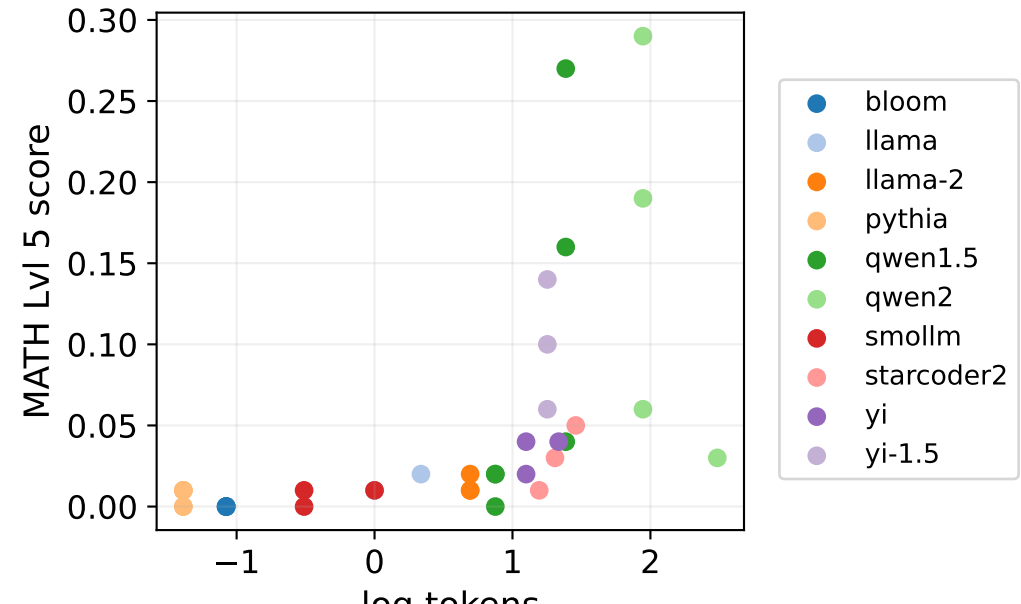

Supplement: supplementary_material [file attachment]

# Open LLM Leaderboard v1

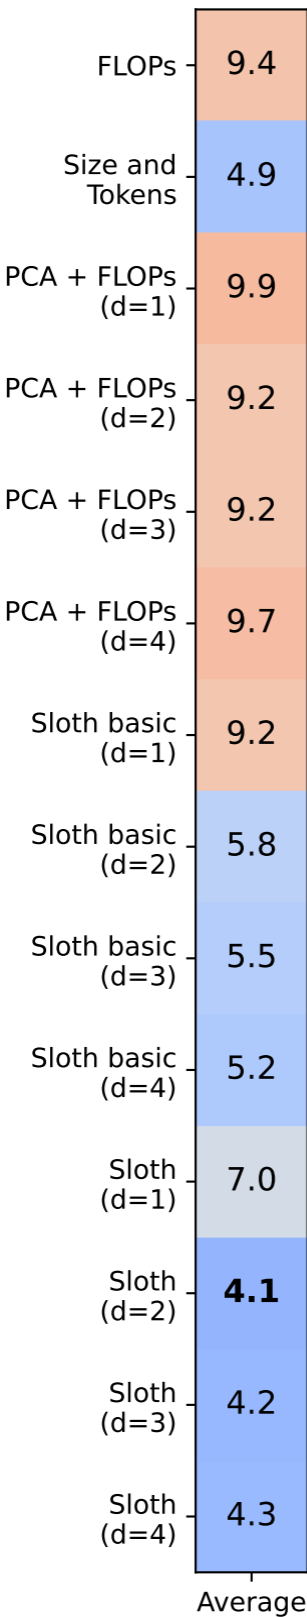

Supplement: supplementary_material [file attachment]

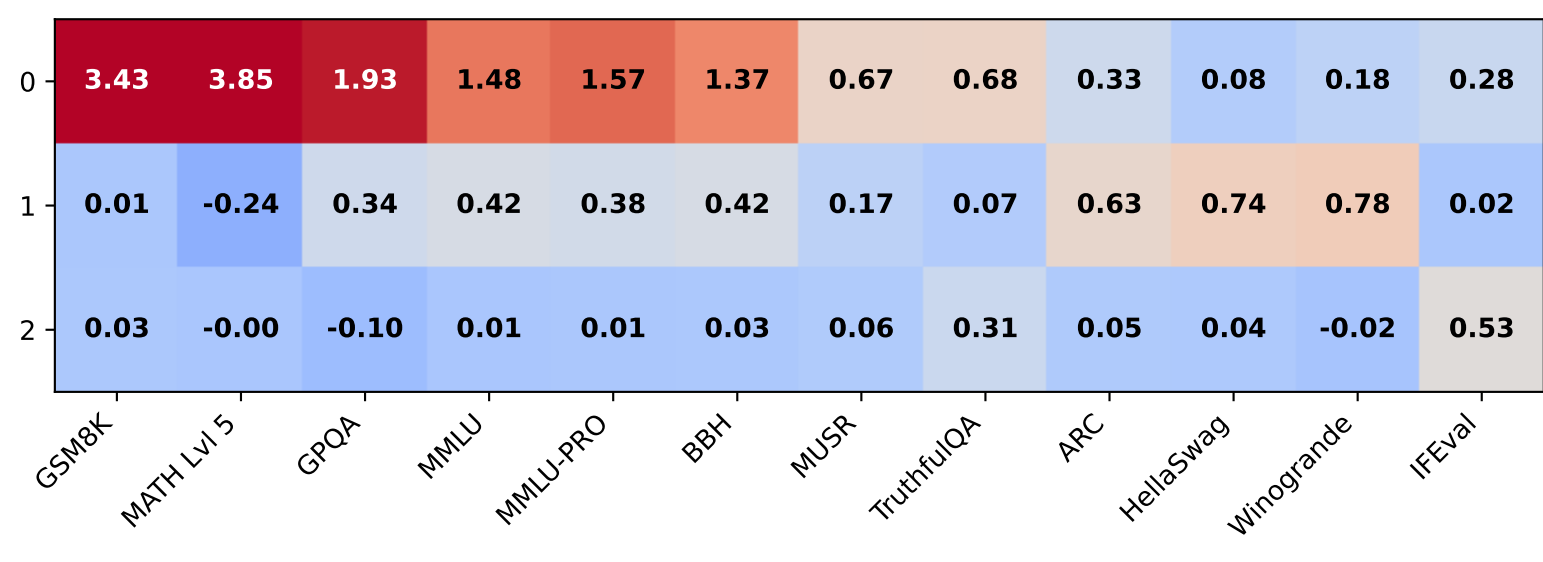

Supplement: supplementary_material [file attachment]

$\Lambda$ 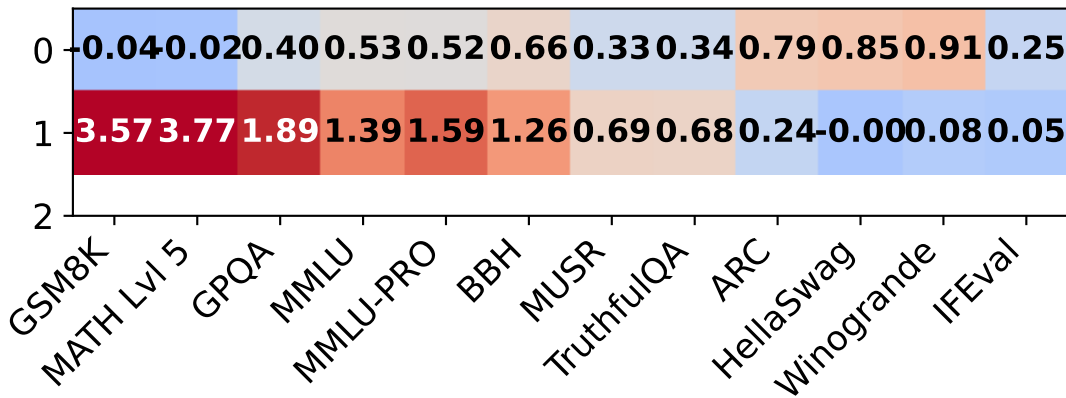 $\beta_{\text{HE}}$ 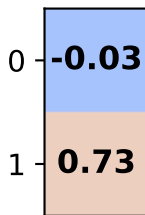

Supplement: supplementary_material [file attachment]

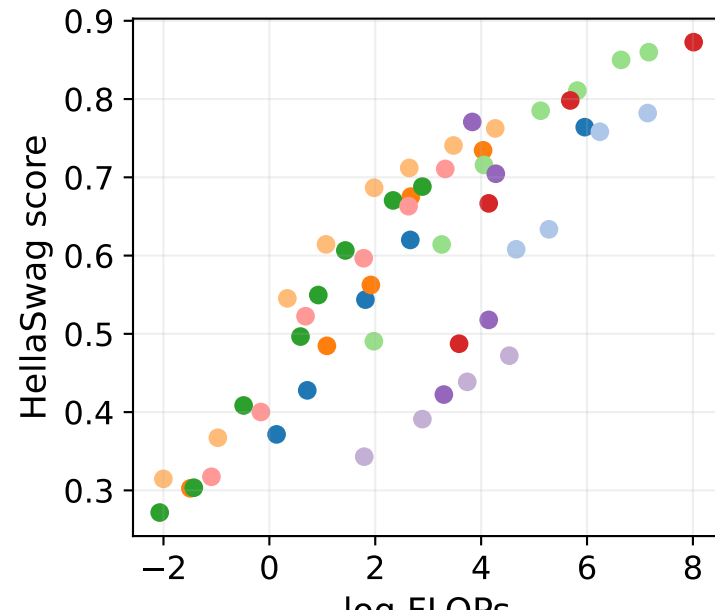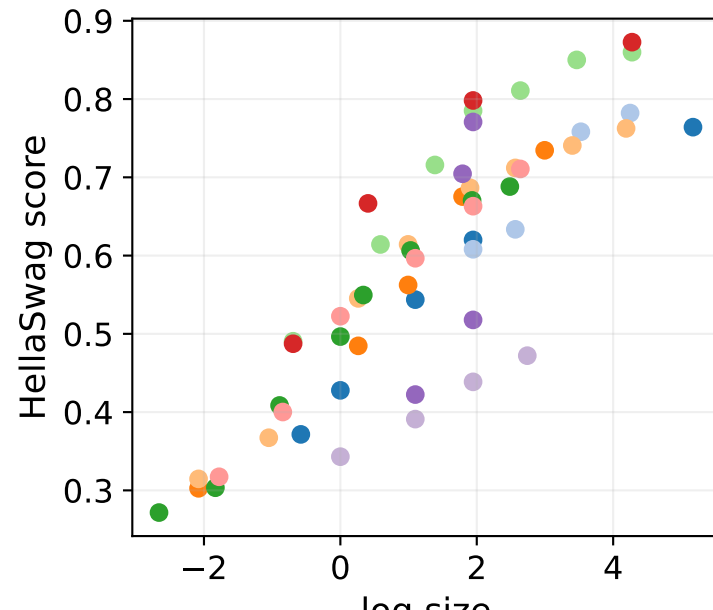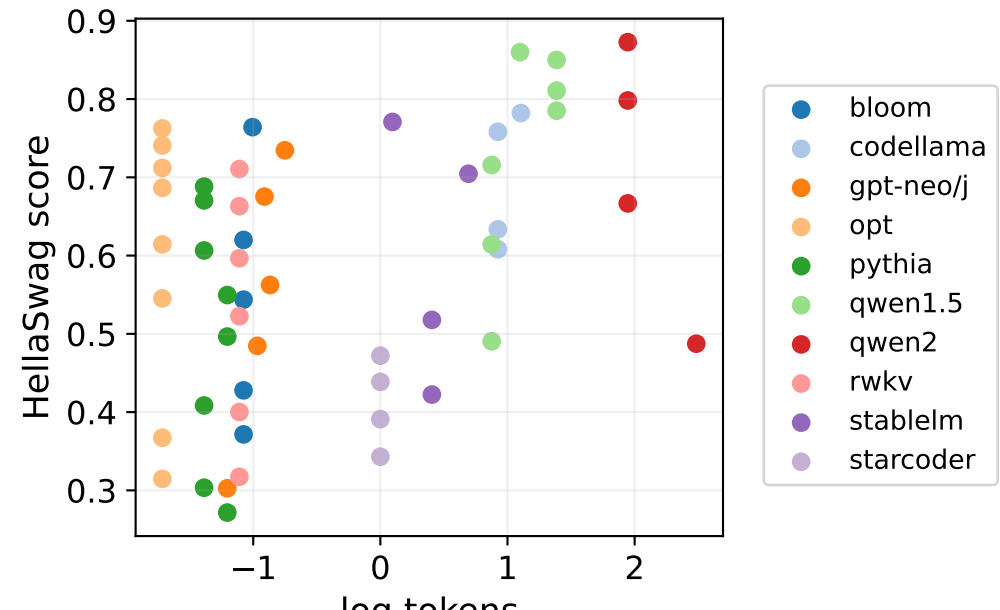

Supplement: supplementary_material [file attachment]

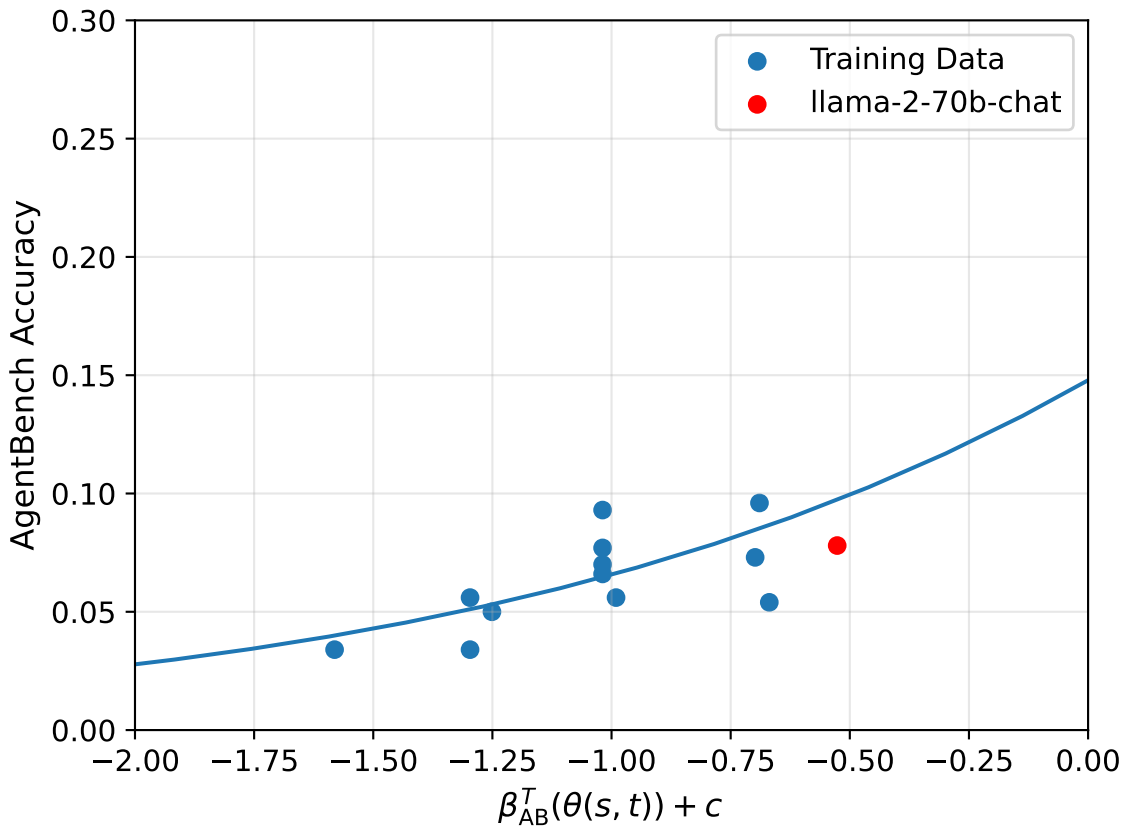

Supplement: supplementary_material [file attachment]

# Open LLM Leaderboard v1/v2

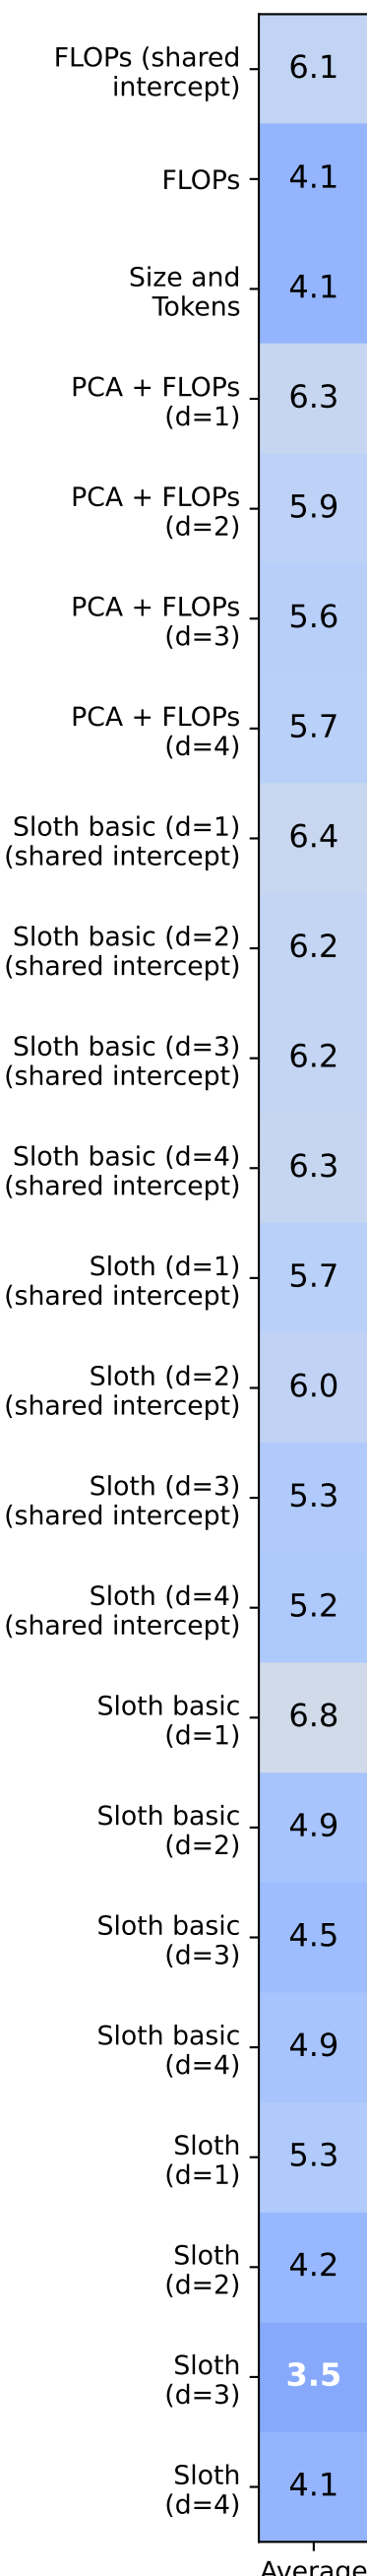

Average

Supplement: supplementary_material [file attachment]

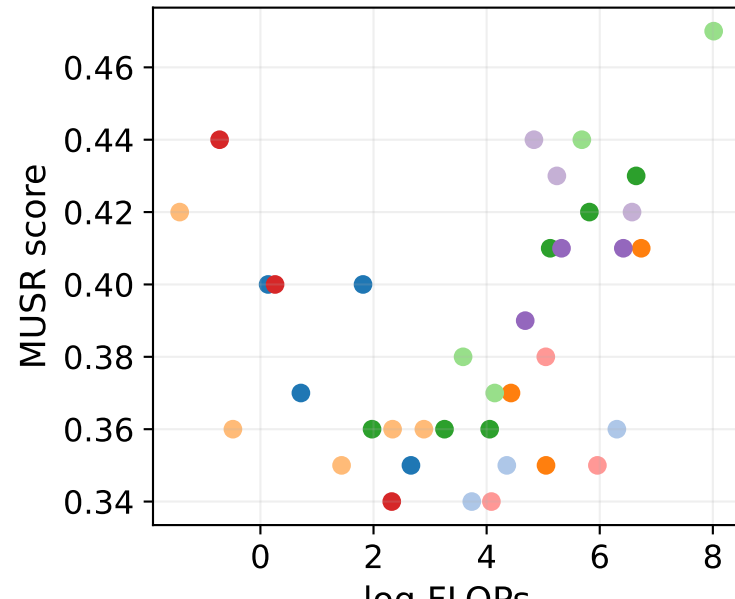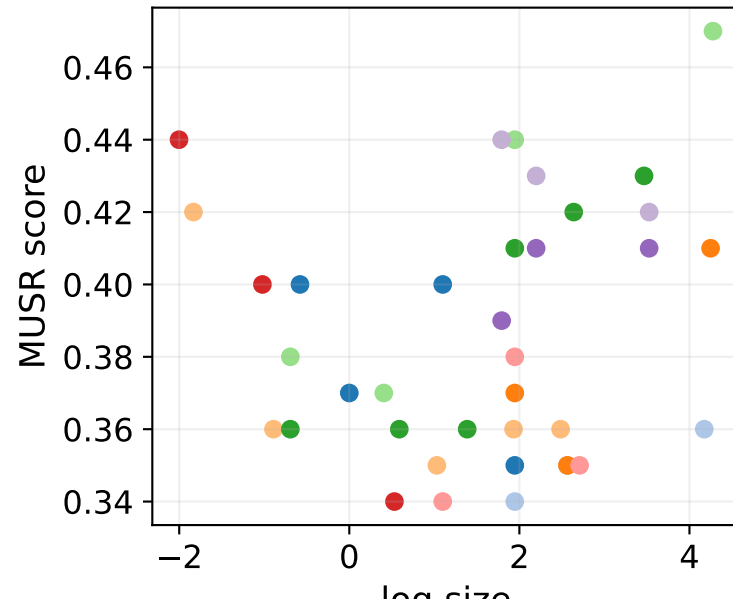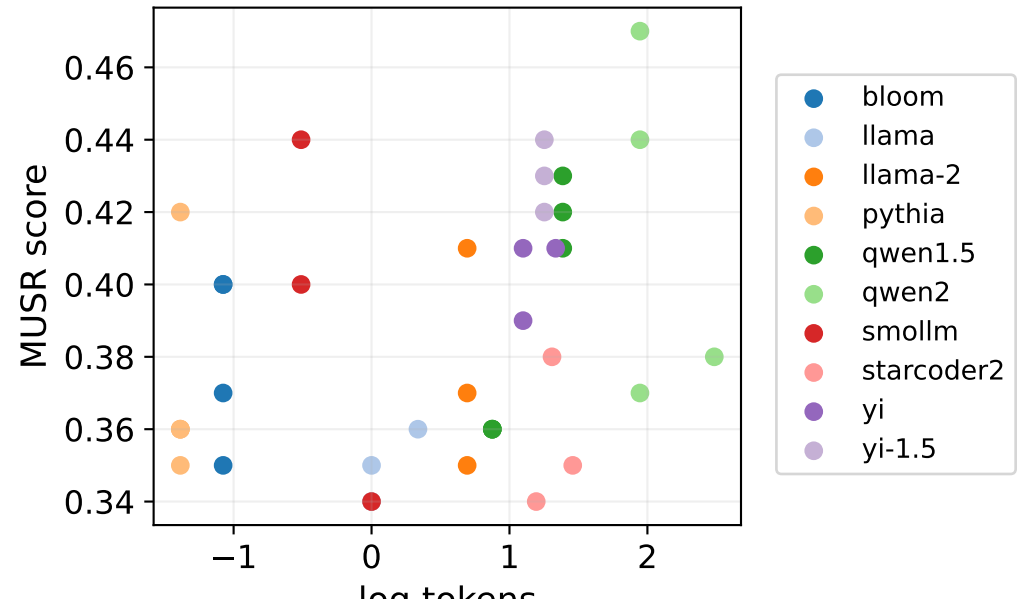

Supplement: supplementary_material [file attachment]

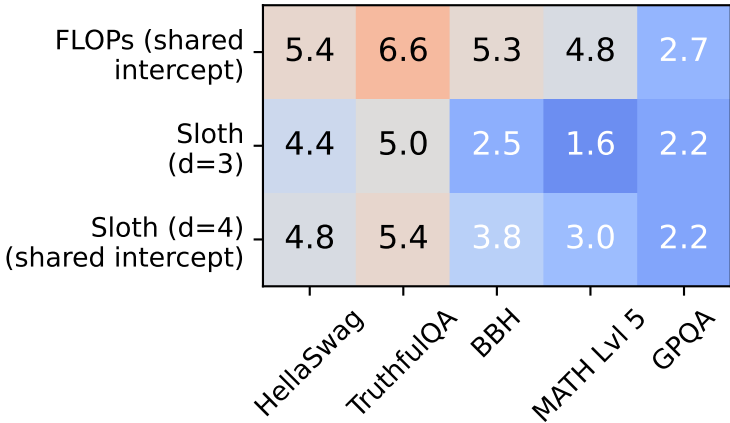

Supplement: supplementary_material [file attachment]

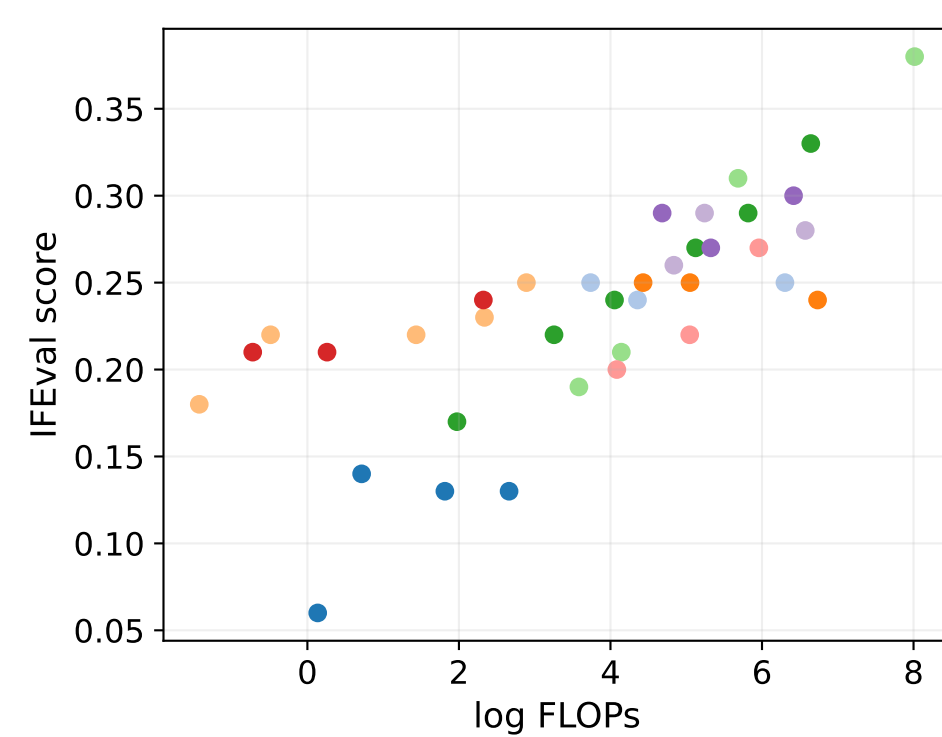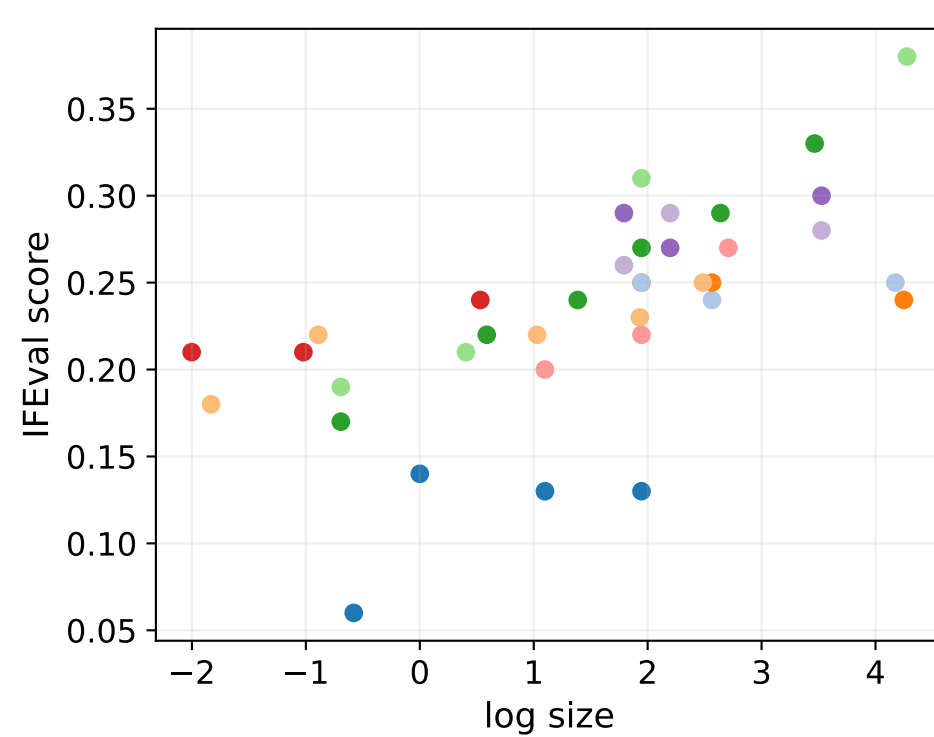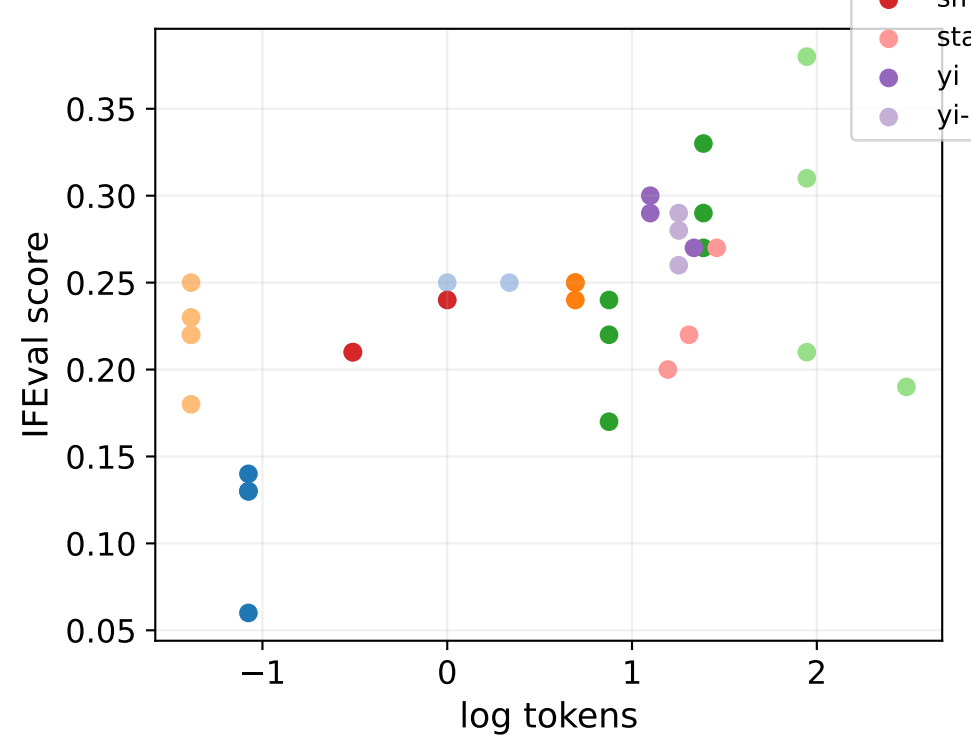

Supplement: supplementary_material [file attachment]

# Open LLM Leaderboard v1

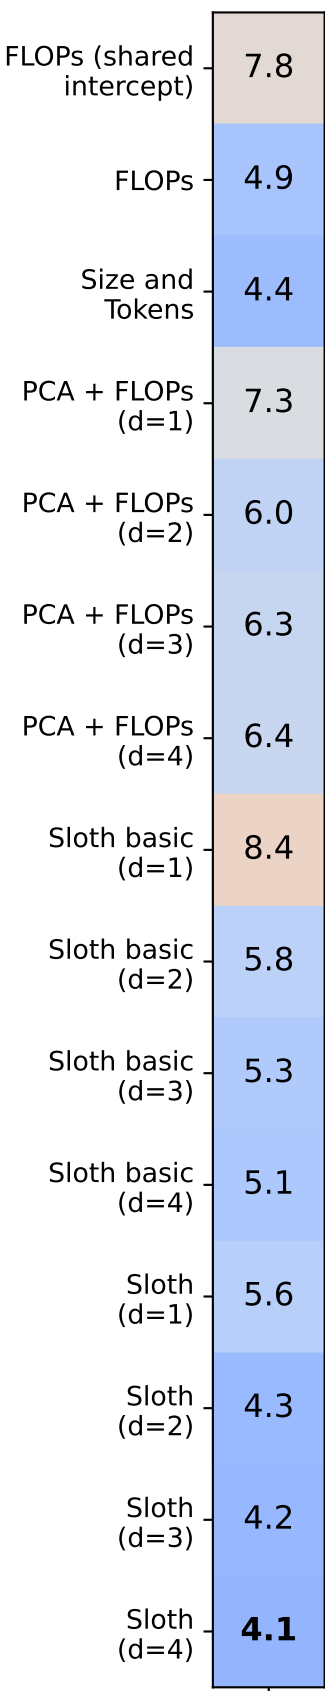

Average

Supplement: supplementary_material [file attachment]

$\Lambda$ 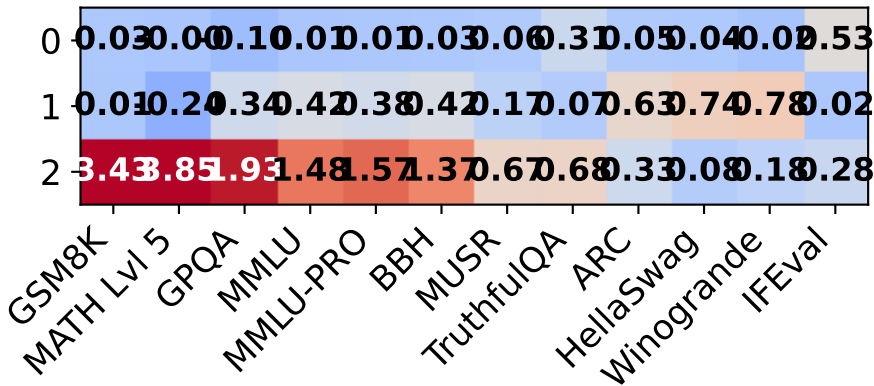 $\beta_{\text{EQ}}$ 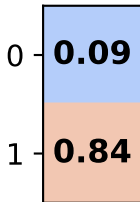

Supplement: supplementary_material [file attachment]

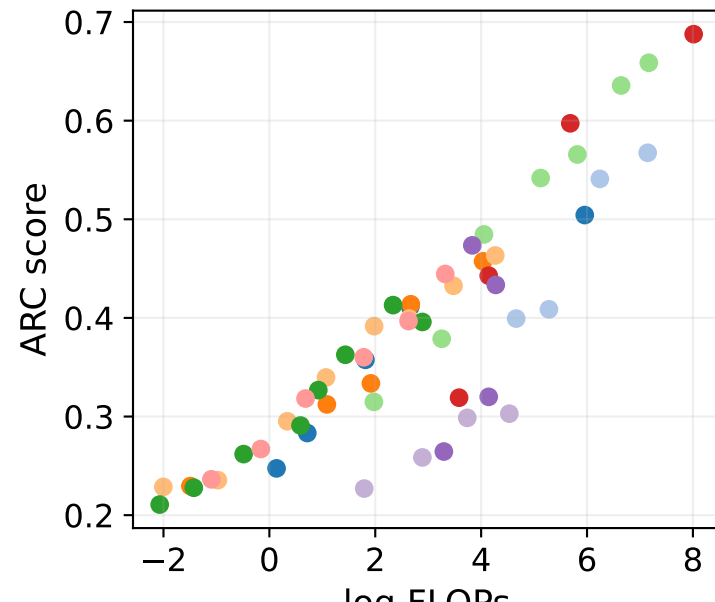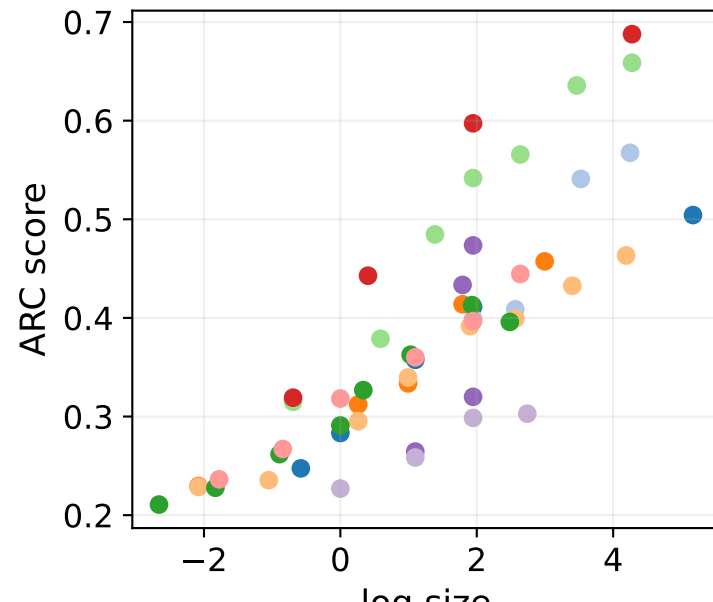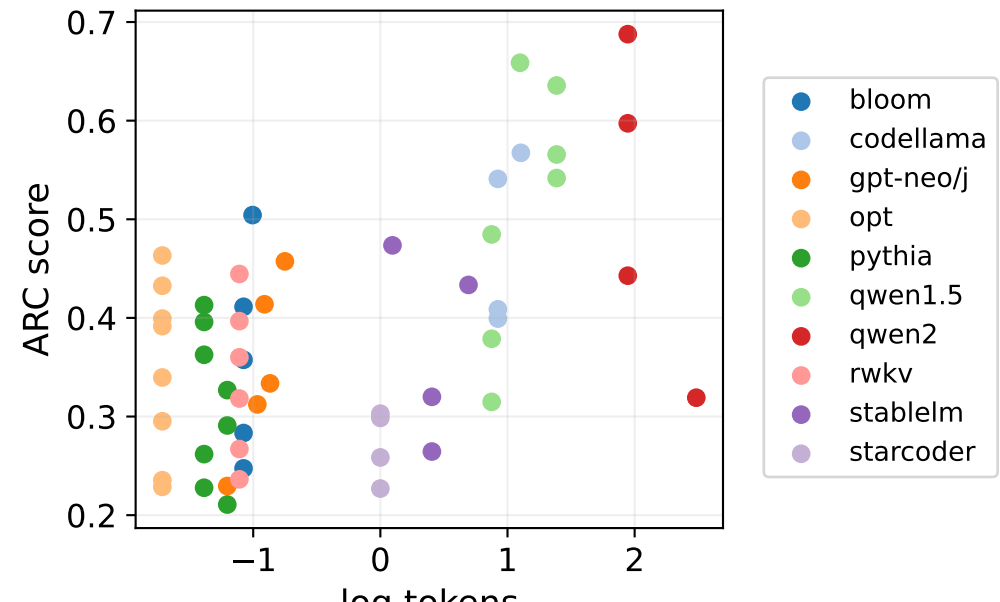

Supplement: supplementary_material [file attachment]

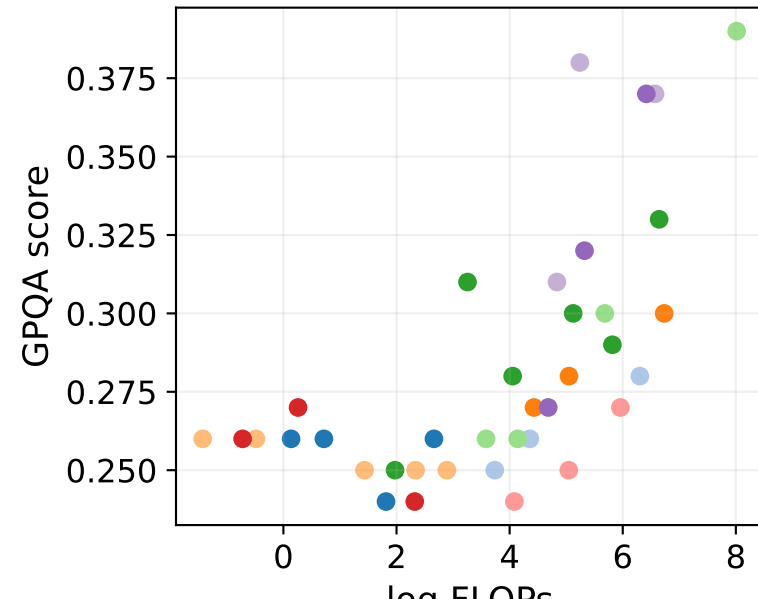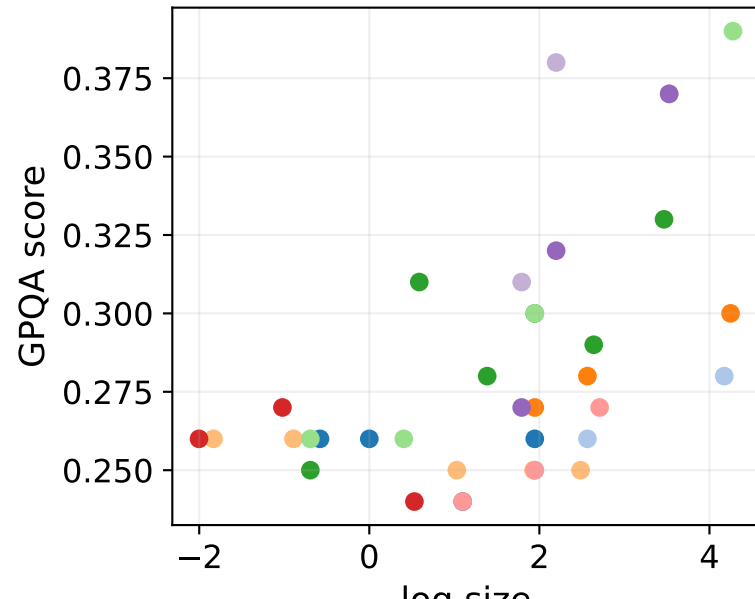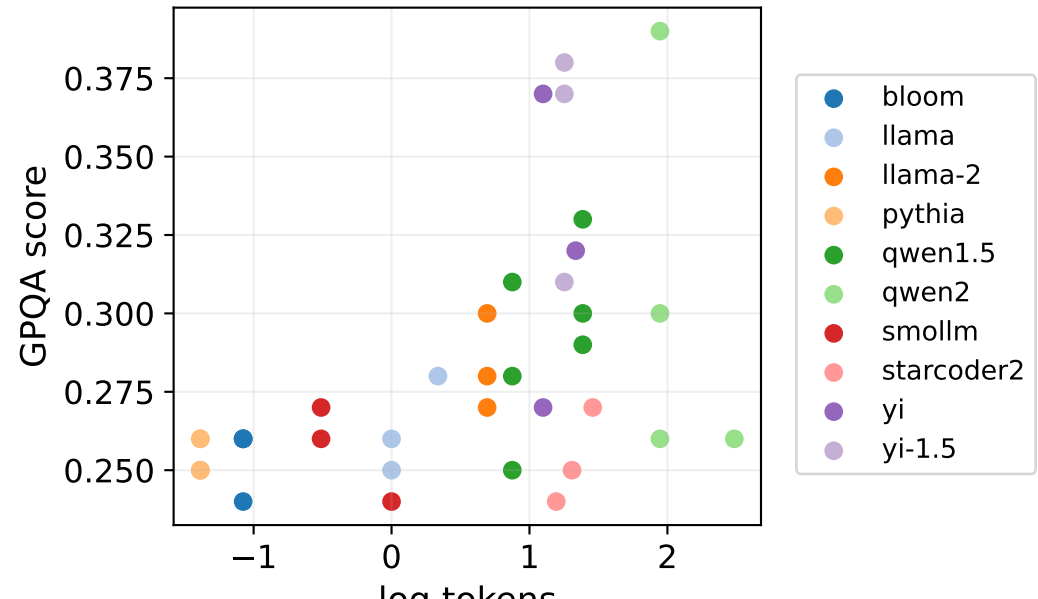

Supplement: supplementary_material [file attachment]
